1 **Circadian regulation of macromolecular complex turnover and proteome renewal**

2

3 **Authors:** Estere Seinkmane<sup>1</sup>, Anna Edmondson<sup>1</sup>, Sew Y Peak-Chew<sup>1</sup>, Aiwei Zeng<sup>1</sup>, Nina M  
4 Rzechorzek<sup>1</sup>, Nathan R James<sup>1</sup>, James West<sup>2</sup>, Jack Munns<sup>1</sup>, David CS Wong<sup>1</sup>, Andrew D  
5 Beale\*<sup>1</sup>, John S O'Neill\*<sup>1</sup>

6

7 <sup>1</sup>MRC Laboratory of Molecular Biology, Francis Crick Avenue, Cambridge, CB2 0QH

8 <sup>2</sup>Department of Medicine, University of Cambridge, UK

9 \*correspondence to: [oneillj@mrc-lmb.cam.ac.uk](mailto:oneillj@mrc-lmb.cam.ac.uk), [abeale@mrc-lmb.cam.ac.uk](mailto:abeale@mrc-lmb.cam.ac.uk)

10 **ABSTRACT**

11

12 Although costly to maintain, protein homeostasis is indispensable for normal cellular  
13 function and long-term health. In mammalian cells and tissues, daily variation in global  
14 protein synthesis has been observed, but its utility and consequences for proteome integrity  
15 are not fully understood. Using several different pulse-labelling strategies, here we gain  
16 direct insight into the relationship between protein synthesis and abundance proteome-  
17 wide. We show that protein degradation varies in-phase with protein synthesis, facilitating  
18 rhythms in turnover rather than abundance. This results in daily consolidation of proteome  
19 renewal whilst minimising changes in composition. Coupled rhythms in synthesis and  
20 turnover are especially salient to the assembly of macromolecular protein complexes,  
21 particularly the ribosome, the most abundant species of complex in the cell. Daily turnover  
22 and proteasomal degradation rhythms render cells and mice more sensitive to proteotoxic  
23 stress at specific times of day, potentially contributing to daily rhythms in the efficacy of  
24 proteasomal inhibitors against cancer. Our findings suggest that circadian rhythms function  
25 to minimise the bioenergetic cost of protein homeostasis through temporal consolidation of  
26 protein turnover.

## 27 Introduction

28

29 Protein homeostasis, or proteostasis, refers to the dynamic process of maintaining protein  
30 abundance and functionality. It involves regulation of synthesis, folding, localisation and  
31 degradation of proteins, such that the appropriate proteins are present within the  
32 appropriate concentration range, in the correct compartment, at the right time. Multiple  
33 quality control and stress response mechanisms function to preserve proteome integrity  
34 over multiple timescales (Wolff *et al*, 2014; Harper & Bennett, 2016) whereas failure of  
35 proteostasis networks is strongly associated with impairment of cell function as well as  
36 ageing-related pathological states such as neurodegeneration (Labbadia & Morimoto, 2015;  
37 Hipp *et al*, 2019). By contrast, priming of proteostatic pathways enhances cellular resistance  
38 to proteotoxic stress (Rzechorzek *et al*, 2015).

39

40 Most aspects of mammalian cellular and organismal physiology are regulated over a  
41 circadian (about daily) timescale to anticipate the differing demands of day and night  
42 (Dibner *et al*, 2010; Atger *et al*, 2017). Whilst circadian rhythms are generated cell  
43 autonomously (Welsh *et al*, 2004; Yoo *et al*, 2004), *in vivo*, myriad cellular clocks throughout  
44 the body are synchronised with daily environmental cycles by systemic timing cues. For  
45 example, daily rhythms of feeding entrain cellular clocks through the insulin signalling  
46 pathway to stimulate PERIOD "clock protein" production *via* activation of mammalian target  
47 of rapamycin complexes (mTORCs) (Crosby *et al*, 2019). Daily rhythms of PERIOD and  
48 mTORC activity facilitate daily rhythms of gene expression and protein synthesis. In  
49 particular, mTORC1 is a master regulator of bulk 5'-cap-dependent protein synthesis,  
50 degradation and ribosome biogenesis (Valvezan & Manning, 2019) whose activity is  
51 circadian-regulated in tissues and in cultured cells (Ramanathan *et al*, 2018; Feeney *et al*,  
52 2016a; Stangherlin *et al*, 2021b; Mauvoisin *et al*, 2014; Jouffe *et al*, 2013; Sinturel *et al*,  
53 2017; Cao, 2018). It is plausible that daily rhythms of mTORC activity underlie many aspects  
54 of daily physiology (Crosby *et al*, 2019; Stangherlin *et al*, 2021a; Beale *et al*, 2023b).

55

56 Most models for circadian regulation of mammalian cell function have suggested that daily  
57 rhythms in the transcription of 'clock-controlled genes' leads to daily rhythms in the  
58 abundance, and thus activity, of the encoded protein (Cox & Takahashi, 2019; Zhang *et al*,

59 2014; Andreani *et al*, 2015). However, recent -omics approaches, which measure many  
60 thousands of individual transcripts and proteins, have revealed multiple discrepancies with  
61 this abundance-based hypothesis, such as poor correlations between mRNA and encoded  
62 protein abundance (Stangherlin *et al*, 2021a). Moreover, the rather modest extent of daily  
63 changes in protein abundance (typically < 20%), and poor reproducibility between  
64 independent studies (Janich *et al*, 2015; Mauvoisin *et al*, 2014; Reddy *et al*, 2006; Robles *et*  
65 *al*, 2014; Mauvoisin & Gachon, 2020; Brooks *et al*, 2023), suggests that physiological  
66 variation in protein abundance is unlikely to account for large daily variations in multiple  
67 biological functions observed in tissues and cultured cells. Indeed, daily cycles of protein  
68 abundance would appear contrary to the essential requirement for maintaining  
69 proteostasis, which the major fraction of cellular energy budgets are spent to sustain  
70 (Buttgereit & Brand, 1995; Lane & Martin, 2010).

71

72 Compelling evidence for physiological daily variation in global rates of protein synthesis  
73 cannot be ignored, however (Lipton *et al*, 2015; Feeney *et al*, 2016a; Stangherlin *et al*,  
74 2021b). Such observations are difficult to reconcile with linked observations that, excepting  
75 feeding-driven changes in mouse liver, total cellular volume and protein levels show little  
76 daily variation (Stangherlin *et al*, 2021b; Hoyle *et al*, 2017; Sinturel *et al*, 2017). To resolve  
77 these apparent discrepancies we have proposed that, in non-proliferating cells, daily  
78 changes in protein synthesis are accompanied by changes in protein degradation  
79 (Stangherlin *et al*, 2021a), resulting in daily cycles of protein turnover. This further predicts  
80 that daily rhythms in protein turnover prevail over rhythms in protein abundance to favour  
81 rhythmic proteome renewal over compositional variation. Daily turnover rhythms would be  
82 particularly beneficial for coordinated biogenesis of multiprotein complexes, since complex  
83 assembly requires individual subunits to be present stoichiometrically at the same time, in  
84 the same cellular compartment, or else be wastefully degraded (Juszkiewicz & Hegde, 2018;  
85 Taggart *et al*, 2020).

86

87 Here, we aimed to test these predictions by investigating circadian regulation of global  
88 protein synthesis and degradation, as well as macromolecular complex turnover,  
89 specifically. In so doing, we utilised bulk pulse-chase labelling to establish proof-of-principle,  
90 before developing a novel time- and cellular fraction- resolved dynamic mass spectrometry

91 approach that provides the first direct and simultaneous measurements of protein synthesis  
92 and abundance proteome-wide. To validate our findings, we then tested for rhythmic  
93 macromolecular complex turnover directly, by quantification of nascent ribosome complex  
94 assembly through the combination of heavy uridine pulse-labelling of nascent RNA with  
95 ribosome purification. Given its importance in health and disease, we also aimed to  
96 investigate the functional consequences of rhythmic proteostasis regulation, revealing time-  
97 of-day-dependent differential sensitivity to proteotoxic stress in both cells and mice.  
98

99 **Results**

100

101 **Phase-coherent global rhythms in protein synthesis and degradation**

102

103 We first asked whether there was any indication of cell-autonomous daily variation in  
104 protein turnover in confluent cultures of non-transformed quiescent lung fibroblasts  
105 derived from mice expressing the rhythmic luciferase reporter PER2::LUC. Using this cellular  
106 model under constant conditions, longitudinal bioluminescence recordings from parallel  
107 replicate cultures can be used to provide a robust report of cell-autonomous circadian  
108 timekeeping and establish circadian phase (Yoo *et al*, 2004; Feeney *et al*, 2016b). To  
109 measure protein degradation in parallel with synthesis, and thus assess the level of protein  
110 turnover, we first employed a traditional <sup>35</sup>S-methionine/cysteine pulse-chase labelling  
111 strategy (15 min pulse, 60 min chase).

112

113 The experiment was performed over a 24h time series followed by soluble protein  
114 extraction using digitonin, which preferentially permeabilises the plasma membrane over  
115 organelle membranes. For pulse alone, <sup>35</sup>S incorporation varied significantly over this period  
116 (Fig 1A, B, S1A), consistent with previous reports of rhythmic protein synthesis (Stangherlin  
117 *et al*, 2021b; Lipton *et al*, 2015; Zhuang *et al*, 2023). As expected, ~20% of nascently  
118 synthesised proteins had been degraded after 1 hour of chase, representing rapid quality  
119 control-associated proteasomal degradation of orphan subunits as well as aberrant  
120 translation products due to premature termination and/or protein misfolding (Schubert *et al*,  
121 *et al*, 2000; Wheatley *et al*, 1980; Harper & Bennett, 2016). Importantly, the proportion of  
122 degraded protein varied over time, being highest at around the same time as increased  
123 protein synthesis (Fig 1B), indicating time-of-day variation in digitonin-soluble protein  
124 turnover which cannot be solely attributed to previously reported circadian regulation of  
125 protein solubility (Stangherlin *et al*, 2021b). Rather, it suggests that global rates of protein  
126 degradation may be co-ordinated with protein synthesis rates, and may vary over the  
127 circadian cycle.

128

129 Quality control-associated degradation predominantly occurs via the ubiquitin-proteasome  
130 system (UPS) (Schubert *et al*, 2000; Wang *et al*, 2013). To directly test whether the global

131 rate of proteasomal protein degradation is under circadian control, as suggested previously  
132 (Desvergne *et al*, 2016; Ryzhikov *et al*, 2019; Hansen *et al*, 2021), we employed biochemical  
133 in-cell assays for proteasomal activity at discrete biological times over the circadian cycle.  
134 Over two days under constant conditions we observed a significant ~24h oscillation in  
135 proteasomal trypsin-like and chymotrypsin-like activities of the proteasome, but not  
136 caspase-like activity (Fig 1C). Moreover, we detected a significant interaction between  
137 genotype and biological time when comparing trypsin-like proteasome activity between  
138 wild type and Cryptochrome1/2-deficient cells, that lack canonical circadian transcriptional  
139 feedback repression (Fig S1B, (Wong *et al*, 2022)). Previous proteomics studies under similar  
140 conditions have revealed minimal circadian variation in proteasome subunit abundance  
141 (Wong *et al*, 2022), suggesting that proteasome activity rhythmicity, and therefore rhythms  
142 in UPS-mediated protein degradation, are regulated post-translationally (Marshall &  
143 Vierstra, 2019; Hansen *et al*, 2021).

144

145 If global rates of proteasome-mediated protein degradation vary in phase with protein  
146 synthesis over the circadian cycle, this would result in circadian organisation of nascent  
147 protein turnover. To validate this, we employed puromycin, an antibiotic which is  
148 incorporated into nascent polypeptides by both elongating and stalled ribosomes (Nathans,  
149 1964; Semenov *et al*, 1992) thus making these peptides amenable to immunodetection  
150 (Aviner, 2020; Goodman & Hornberger, 2013; Schmidt *et al*, 2009). Unlike <sup>35</sup>S-labelled and  
151 other amino acid analogues, puromycin can be added to cell media directly, without the  
152 need to remove endogenous amino acids, thereby minimising acute perturbations. Whilst  
153 most studies have used puromycin incorporation as a proxy for translation rate, we  
154 reasoned that protein degradation should also affect the observed levels of puromycylated  
155 peptides, as these peptides are prematurely terminated and are thus identified and  
156 degraded rapidly by the ubiquitin-proteasome system (Lacsina *et al*, 2012; Szeto *et al*,  
157 2006). Acute (30 min) puromycin treatment of cells in culture, with or without proteasomal  
158 inhibition (by bortezomib, BTZ), allowed us to measure both total nascent polypeptide  
159 production (+BTZ) and the amount of nascent polypeptides remaining when the UPS  
160 remained active (-BTZ). This allowed inference of the level of UPS-mediated degradation of  
161 puromycylated peptides within each time window, as a proxy for nascent protein turnover  
162 (Fig 1D).

163

164 As determined by anti-puromycin western blots, over two days under constant conditions,  
165 puromycin incorporation in the presence of BTZ showed significant circadian variation. In  
166 contrast, cells that were treated with puromycin alone showed no such variation, and nor  
167 did total cellular protein levels (Fig 1E, Fig S2A). These observations support the possibility  
168 that phase-coherent daily rhythms in protein degradation might act in parallel with rhythms  
169 in translation rate, such that the proportion of degraded peptides vary in synchrony with  
170 those that were translated (Fig 1E).

171

172 Protein synthesis is the most energetically expensive process that most cells undertake  
173 (Buttgereit & Brand, 1995; Lane & Martin, 2010). *In vivo*, the temporal consolidation of  
174 global translation might be expected to confer a fitness advantage by organising this  
175 energetically expensive process to coincide with the biological time of greatest (anticipated)  
176 nutrient availability. In nocturnal mice, for example, hepatic ribosome biogenesis  
177 preferentially occurs at night, during the active/feeding phase (Jouffe *et al*, 2013; Jang *et al*,  
178 2015; Sinturel *et al*, 2017). To explore the physiological relevance of our cellular  
179 observations, we adapted the puromycin  $\pm$  BTZ labelling strategy *in vivo*, to test the specific  
180 prediction that nascent protein turnover is increased during the active phase compared with  
181 the rest phase. In livers isolated from mice at opposite times of day, we observed  
182 significantly higher turnover during the night (active/feeding phase, ZT13), compared with  
183 the daytime (rest/fasting phase, ZT1) (Fig 1F, Fig S2B). We suggest that both in cells and in  
184 mouse liver *in vivo*, the daily variation in nascent protein turnover could be an expected  
185 consequence of imperfect translation, which requires ubiquitous protein quality control  
186 mechanisms to shield the proteome from defective, misfolded, or orphaned (excess  
187 subunit) proteins.

188

### 189 **Proteome-wide investigation of circadian protein synthesis, abundance, and turnover**

190

191 Beyond protein quality control, Figure 1 invited us to consider how circadian regulation of  
192 global protein degradation might interact with rhythmic synthesis to impact proteome  
193 composition more broadly, at the level of individual proteins. In the simplest scenario,  
194 protein abundance would correlate with synthesis rate; however, rhythmic degradation



195 might attenuate variation in the abundance of rhythmically synthesised protein, or  
196 alternatively it may generate variation in the abundance of constitutively synthesised  
197 proteins. We devised a novel proteome-wide approach to test each of these scenarios.

198

199 To measure protein production and abundance simultaneously and directly over the  
200 circadian cycle, we utilised pulsed stable isotopic labelling with amino acids in culture  
201 (pSILAC), in combination with TMT-based mass spectrometry quantification to allow  
202 multiplexed measurements. Although pSILAC is normally applied continuously and protein  
203 harvested at multiple points to measure half-life (Doherty *et al*, 2009; Schwanhäusser *et al*,  
204 2011; Ross *et al*, 2021), here we used a repeated fixed time window for SILAC labelling to  
205 measure newly-synthesised proteins (Fig 2A, B). To enable sufficient heavy labelling for  
206 detection, a 6h time window was employed, thus measuring synthesis and abundance  
207 within each quarter of the circadian cycle.

208

209 Over our 48h time series, we reliably detected heavy peptides for 2528 unique proteins  
210 from whole cell lysates, representing estimates of their synthesis at each time window, and  
211 compared this with their total abundance calculated from the sum of heavy and light  
212 peptides (Supplementary Table 1; examples in Fig 2C). The specific number or proportion of  
213 rhythmically synthesised and/or abundant proteins is expected to vary with detection  
214 method (Hughes *et al*, 2017; Mei *et al*, 2021) and may be susceptible to overestimation of  
215 rhythmicity. We therefore employed several methods, including less stringent RAIN and  
216 more stringent ANOVA, to compare the extent of temporal variation in protein synthesis  
217 and total abundance (Fig 2D, E).

218

219 Consistent with similar previous studies, <10% of detected proteins showed any significant  
220 variation over the circadian cycle (Fig 2E). This is also expected considering the long average  
221 half-life (~days) of mammalian proteins (Mathieson *et al*, 2018; Schwanhäusser *et al*, 2011;  
222 Wong *et al*, 2022). Amongst those with significant temporal variation, we found that similar  
223 proportions of the proteome showed rhythms in synthesis as rhythms in abundance (Fig 2E).  
224 Of the rhythmically abundant proteins, a minority showed accompanying rhythms in  
225 synthesis, with no difference in phase (Fig 2E, F). The proportion of such proteins was more  
226 than expected by chance ( $p < 0.0001$ , Fisher's Exact Test), and their behaviour aligns with the

227 canonical "clock-controlled gene" paradigm, in which physiological rhythms are proposed to  
228 arise through circadian variation in protein abundance, generated *via* transcriptional and  
229 translational oscillations. Strikingly however, the majority of rhythmically synthesised  
230 proteins showed no accompanying rhythm in abundance and *vice versa* (Fig 2E). Moreover,  
231 the extent of daily synthesis variation (fold change) was significantly greater than  
232 abundance (Fig 2D). These observations are consistent with our model of widespread  
233 temporal organisation of protein degradation within the circadian-regulated proteome.

234

235 Considering all detected proteins that were either rhythmically synthesised or rhythmically  
236 abundant, peaks occurred in all four quarters of the cycle (Fig 2G), but clustered in the  
237 quarter of the cycle immediately after the peak of PER2::LUC, in accordance with proteome-  
238 wide rhythms (Fig 1A, B). Gene ontology analysis did not reveal functional enrichment for  
239 any particular biological process or compartment in either group compared with  
240 background.

241

#### 242 **Targeted investigation of circadian protein synthesis, abundance, and turnover**

243

244 The experiment above was designed to combine and compare two time-resolved processes  
245 — that of circadian variation and that of protein production — and so only considered  
246 proteins with reliably detectable heavy label incorporation within a given labelling window  
247 (6h) across all timepoints. This inevitably limited and biased the proteome coverage towards  
248 abundant proteins with higher synthesis rates, irrespective of cellular compartment or  
249 function. This probably explains the absence of functional enrichment among rhythmic  
250 proteins that have been observed in other studies, as well as the lower level of overall  
251 variation in synthesis than would be expected from the bulk labelling investigations.

252

253 To gain more insight into the dynamics of circadian proteomic flux, we refined our pSILAC  
254 approach, this time focusing on proteins in complexes. Specifically, we aimed to test the  
255 hypothesis that circadian control of translation and turnover facilitates the coordinated  
256 assembly of multiprotein complexes (Taggart *et al*, 2020; O'Neill *et al*, 2020; Stangherlin *et*  
257 *al*, 2021a). To achieve this, we utilised and adjusted LOPIT-DC protocol (Geladaki *et al*, 2019)  
258 which was developed to separate different cellular compartments and fractions, to isolate

259 the macromolecular complex (MMC) fraction *via* gentle cell lysis followed by sequential  
260 ultracentrifugation.

261

262 To further improve the sensitivity of our pSILAC method to circadian differences, especially  
263 those occurring among most recently synthesised proteins, we also employed a shorter  
264 pulse (1.5h). To compensate for the shorter pulse and the fractionation, which otherwise  
265 would have resulted in decreased coverage, especially of the heavy peptides, we employed  
266 further technical improvements. Namely, we added a so-called booster channel: an  
267 additional fully heavy-labelled cell sample within a TMT mixture (Klann *et al*, 2020). When  
268 the mixture is analysed by MS, heavy peptides from the booster channel increase the overall  
269 signal of all identical heavy peptides at MS1 level; at MS2 and MS3 this results in improved  
270 detection of heavy proteins in the other TMT channels of interest, and is particularly  
271 advantageous for the proteins with lower turnover that would fall below the MS1 detection  
272 limit without the booster.

273

274 With this new design, heavy peptides within the enriched MMC fraction were quantified  
275 across two days (as for the first pSILAC experiment), representing proteins synthesised  
276 within 1.5h at each timepoint (Fig 3A, B, Supplementary Table 2). Despite enriching for only  
277 one cellular compartment, the overall coverage in this experiment was similar to the  
278 previous one (6577 and 6264 proteins, respectively), due to the altered and more targeted  
279 approach; with heavy peptides detected for 2302 proteins. There was a significant circadian  
280 variation among the overall amount of heavy labelled peptides that was consistent with  
281 rhythmic production of nascent proteins, whereas the total protein level in this fraction  
282 showed no change over time (Fig S3A, B).

283

284 Using boosted fractionated pSILAC, we immediately noticed a 3-fold increase in the  
285 proportion of proteins that varied significantly over time in their synthesis as compared to  
286 the whole-cell level, regardless of algorithm used (Fig 3C). The production of rhythmically  
287 synthesised proteins in this fraction also varied over time to a far greater extent than did  
288 their abundance (~2-fold greater variation, Fig 3D). Moreover, we found that a much higher  
289 proportion of detected proteins exhibited rhythms in both synthesis and total abundance  
290 than was observed at the whole-cell level (Fig 3E). As in whole-cell, the proportion of

291 proteins showing rhythmic synthesis but not abundance and *vice versa*, was much greater  
292 than expected by chance ( $p < 0.0001$ , Fisher's Exact Test). By inference therefore, the  
293 proportion of proteins that are rhythmically degraded in this fraction must equal or exceed  
294 the proportion that are rhythmically synthesised. It is also noteworthy that although there  
295 were small sets of proteins that were rhythmic in both whole-cell (Figure 2) and MMC  
296 fractions (Figure 3), in both synthesis and total abundance, none of these four overlaps  
297 were higher than would have been expected by chance.

298

299 Analysis of the proteins in the MMC fraction revealed 243 annotated multiprotein  
300 complexes (from CORUM, COMPLEAT and manual annotation (Ori *et al*, 2016; Giurgiu *et al*,  
301 2019)) to be present, including 82 complexes for which half or more annotated subunits  
302 were detected (Supplementary Table 3). It has previously been shown that protein subunits  
303 within the same complex tend to share similar turnover rates, which is thought to facilitate  
304 their co-ordinated assembly and removal (Price *et al*, 2010; Mathieson *et al*, 2018). We  
305 observed this in our data (Fig S3C) but can also add a temporal dimension: for complexes  
306 such as ribosomes, RNA polymerase, chaperonin (CCT) complex and others, the majority of  
307 component subunits not only showed similar average heavy to total protein ratios but also a  
308 similar change in synthesis over the daily cycle (Fig 3F, S3D and E). This supports the  
309 hypothesis that the assembly and turnover of macromolecular protein complexes is under  
310 circadian control.

311

312 Using an alternative approach to estimate the importance of rhythmicity for interactions of  
313 proteins within complexes, we took advantage of the STRING protein-protein interaction  
314 database (Szklarczyk *et al*, 2021). Unlike proteins with rhythmic synthesis at the whole-cell  
315 level, rhythmic proteins in this complex fraction had significantly more annotated physical  
316 interactions than would have been expected by chance given all proteins detected (Fig 3G,  
317 Fig S4). Importantly, these rhythmically synthesised protein subunits were almost all  
318 clustered within the same circadian phase (see Figure 4, discussed below).

319

320 To validate these observations by an orthogonal method, we pulse-labelled cells with  
321 methionine analogue L-azidohomoalanine (Dieterich *et al*, 2006). AHA is an exogenous  
322 substrate, with a lower affinity for methionyl-tRNA synthetase than methionine, whose

323 incorporation into polypeptide chains could potentially impact the stability of labelled  
324 proteins (Ma & Yates, 2018). We therefore only used AHA to assess nascent complex  
325 synthesis, rather than turnover. We analysed the incorporation of the newly synthesised,  
326 AHA labelled proteins into highest molecular weight protein species detected under native-  
327 PAGE conditions (Fig 3H, S3F). We observed a high amplitude daily rhythm of AHA labelling,  
328 indicating the rhythmic translation and assembly of nascent protein complexes. Taken  
329 together, these results show that daily rhythms in synthesis and degradation may be  
330 particularly pertinent for subunits of macromolecular protein complexes.

331

### 332 **Temporal consolidation of biological functions**

333

334 Within the MMC fraction, we found that the vast majority of rhythmically synthesised  
335 proteins showed highest synthesis at the same biological time, shortly after the peak of the  
336 PER2::LUC circadian bioluminescence reporter. Gene ontology analysis of these proteins  
337 (compared with a background list of all proteins detected in this fraction) revealed a clear  
338 enrichment for RNA binding proteins and terms associated with ribosome assembly (Fig 4A).  
339 At the same circadian phase, rhythmically abundant proteins were similarly enriched for  
340 terms relating to RNA binding and ribonucleoprotein biogenesis, as well as many proteins  
341 associated with stress granule assembly, such as ataxin-2 and many DDX family members  
342 (Fig 4A,B). Ribosomes and stress granules themselves control protein synthesis and regulate  
343 each other, so it is challenging to ascribe causal relationships between the two (Buchan &  
344 Parker, 2009; Riggs *et al*, 2020; Delarue *et al*, 2018) but our analysis clearly suggests a cell-  
345 autonomous surge of ribosome biogenesis.

346

347 Rhythmically synthesised/abundant proteins belonging to classes associated with  
348 ribonucleoproteins did not exhibit commensurate total abundance oscillations at the whole-  
349 cell level (Fig 2, Fig 4B, Supplementary Table 1; (Wong *et al*, 2022; Hoyle *et al*, 2017)), and  
350 this might indicate that some abundance variation in the MMC fraction arises from  
351 redistribution between lighter and denser fractions over the circadian cycle, consistent with  
352 circadian regulation of protein solubility and compartmentalisation described previously  
353 (Wang *et al*, 2019; Stangherlin *et al*, 2021b; Jang *et al*, 2015; Malcolm *et al*, 2019; Zhuang *et al*,  
354 *et al*, 2023). Supporting this possibility, we noted a smaller group of rhythmically abundant

355 proteins in the phase preceding ribosome biogenesis, without any accompanying change in  
356 synthesis. These proteins were enriched by 9-fold for actin and associated regulators of the  
357 actin cytoskeleton ( $q < 0.05$ , Fig 4A, C). This is consistent with circadian regulation of  
358 cytoskeletal dynamics and actin polymerisation that we and others have described  
359 previously (Hoyle *et al*, 2017; Gerber *et al*, 2013). Indeed, as one of the most abundant  
360 cellular proteins, by mass alone, beta-actin accounted for 67% of the temporal  
361 compositional variation in the phase preceding ribosome biogenesis (Supplementary Table  
362 2).

363

### 364 **Circadian regulation of ribosome turnover not abundance**

365

366 The ribosome is by far the most abundant macromolecular complex in the cell (An & Harper,  
367 2020) and showed clear evidence of circadian regulation of turnover but not abundance at  
368 the whole-cell level in our pSILAC proteomics. To validate this result, we took advantage of  
369 two important observations: (1) all fully assembled ribosomes incorporate ribosomal RNA  
370 (rRNA) which can be readily separated from most other cellular RNA by density gradient  
371 centrifugation; (2) pulse-labelling with heavy uridine-<sup>15</sup>N<sub>2</sub> allows nascent RNA to be  
372 distinguished from pre-existing RNA. RNA could then be nuclease-digested, and the ratio of  
373 light to heavy uridine 5'-monophosphate (UMP) quantified by mass spectrometry. By  
374 combining this stable isotope labelling with ribosome purification, we developed a novel  
375 cellular assay which we could use to identify nascently assembled ribosomes (Fig 5A).  
376 Circadian variation in the proportion of heavy UMP-containing assembled ribosomes,  
377 without an accompanying variation in total UMP abundance would directly demonstrate  
378 rhythmicity in ribosomal turnover.

379

380 In line with this prediction, over a circadian time series under constant conditions, we  
381 observed an approximately 24 h oscillation in the percentage of heavy UMP detected within  
382 assembled ribosomes (Fig 5B). We found the highest rates of assembly occurred after the  
383 peak of PER2::LUC bioluminescence (Fig 5B), in line with pSILAC (Fig 3F). In addition, we  
384 observed an oscillation of heavy UMP in total RNA, likely due to rRNA which comprises  
385 >80% of total cellular RNA (Blobel & Potter, 1967; Palazzo & Lee, 2015). Importantly, total  
386 UMP within assembled ribosomes did not change significantly over time and nor did total

387 cellular RNA (Fig 5B), providing further evidence for circadian regulation of macromolecular  
388 complex turnover rather than abundance, in line with our MMC fraction pSILAC results.

389

### 390 **Rhythmic response to proteotoxic stress in cells and in mice**

391 Disruption of proteostasis and sensitivity to proteotoxic stress are strongly linked with a  
392 wide range of diseases (Wolff *et al*, 2014; Harper & Bennett, 2016; Labbadia & Morimoto,  
393 2015; Hipp *et al*, 2019). Evidently, global protein translation, degradation and complex  
394 assembly are crucial processes for cellular proteostasis in general, so cyclic variation in these  
395 processes would be expected to have (patho)physiological consequences. Elevated levels of  
396 misfolded, unfolded, or aggregation-prone proteins perturb proteostasis and provoke  
397 proteotoxic stress responses that disrupt cellular function, leading to cell death unless  
398 resolved (Santiago *et al*, 2020; Deshaies, 2014). Informed by our observations, we predicted  
399 that circadian rhythms of global protein turnover would have functional consequences for  
400 maintenance of proteostasis. Specifically, we expected that cells would be differentially  
401 sensitive to perturbation of proteostasis induced by proteasomal inhibition using small  
402 molecules such as MG132 and BTZ, depending on time-of-day.

403

404 We first assessed the phosphorylation status of eIF2 $\alpha$ , the primary mediator of the  
405 integrated stress response (ISR) pathway, throughout a full circadian timecourse in  
406 fibroblasts under unperturbed versus stress-induced conditions. As expected, acute  
407 proteasomal inhibition by 4h treatment with MG132 induced eIF2 $\alpha$  phosphorylation (Jiang  
408 & Wek, 2005), but importantly this induction varied depending on time of drug treatment  
409 (Fig 6A, S5A), with highest fold-change increase observed around the predicted peak of  
410 protein turnover (shortly after the PER2::LUC peak). Phosphorylation of eIF2 $\alpha$  leads to  
411 inhibition of canonical translation and is suggested to drive a daily decrease in bulk protein  
412 synthesis *in vivo* (Karki *et al*, 2020; Wang *et al*, 2019; Pathak *et al*, 2019). We did not observe  
413 any cell-autonomous rhythm in eIF2 $\alpha$  phosphorylation under basal conditions (Fig S5A), and  
414 so suggest that daily p-eIF2 $\alpha$  rhythms observed *in vivo* likely arise through the interaction  
415 between cell-autonomous mechanisms and daily cycles of systemic cues, e.g. insulin/IGF-1  
416 signalling and body temperature rhythms driven by daily feed/fast and rest/activity cycles  
417 respectively (Crosby *et al*, 2019; Beale *et al*, 2023a).

418

419 A major detrimental consequence of proteotoxic stress is formation of insoluble  
420 intracellular protein aggregates (Albornoz *et al*, 2019; Dantuma & Lindsten, 2010). To test  
421 whether this was also time-of-day dependent, we used a molecular rotor dye that becomes  
422 fluorescent upon intercalation into quaternary structures associated with protein  
423 aggregates (Shen *et al*, 2011) (Fig S5B). As predicted, over two days, challenging cells with  
424 MG132 around the peak of protein turnover resulted in significantly more protein  
425 aggregation compared to controls than the same challenge delivered 12 h later (Fig 6B,  
426 S5C).

427

428 Sustained proteotoxic stress results in cell death (Santiago *et al*, 2020; Deshaies, 2014), and  
429 cell death induced by 6h treatment with BTZ showed a clear circadian rhythm (Fig 6C).  
430 Strikingly, we found roughly twice as much cell death occurred for proteasomal inhibition at  
431 the peak of protein turnover compared with its nadir (Fig 6C, S5D). In contrast, translational  
432 inhibition with cycloheximide revealed no such temporal variation. Together, these data  
433 support our predictions, wherein proteasomal inhibition at peak times of translation and  
434 protein turnover exacerbates proteotoxic stress, protein aggregation, and cell death  
435 because the burden on protein quality control systems at these circadian phases is already  
436 high.

437

438 BTZ and its derivatives are used clinically to treat several types of blood cancers, associated  
439 with a multitude of side effects due to the proteasome's essential function in all cells  
440 (Deshaies, 2014; Manasanch & Orłowski, 2017; Zhang *et al*, 2020). In light of the daily  
441 variation in protein turnover we observed in mouse liver (Fig 1F), we hypothesised that  
442 time-of-day sensitivity to BTZ would also be observed *in vivo*. Accordingly, we observed a  
443 stark day vs night difference in the response to BTZ treatment in mouse liver, assessed by  
444 eIF2 $\alpha$  phosphorylation (Fig 6D-F, Fig S5E). Consistent with this, time-of-day variation in BTZ-  
445 mediated inhibition of tumour growth was recently demonstrated in a mouse tumour  
446 model study (Wagner *et al*, 2021).

447

448 **Discussion**

449



450 In this work, we provide evidence for coordinated circadian regulation of protein synthesis  
451 and degradation, resulting in rhythmic protein turnover, which is particularly significant for  
452 macromolecular complexes such as the ribosome. Across all experiments in this study, we  
453 find that protein synthesis, degradation and turnover is highest during the 6-8h that follow  
454 maximal production of the clock protein PER2. This is coincident with increased glycolytic  
455 flux and respiration (Putker *et al*, 2018), increased macromolecular crowding in the  
456 cytoplasm, decreased intracellular K<sup>+</sup> concentration and increased mTORC activity (Feeney  
457 *et al*, 2016a; Stangherlin *et al*, 2021b; Wong *et al*, 2022). Just as temporal consolidation of  
458 protein synthesis is thought to increase its metabolic efficiency (O'Neill *et al*, 2020), we  
459 suggest that rhythmic turnover may serve to increase the efficiency of proteostasis by  
460 minimising deleterious changes in total cellular protein content and proteome composition.

461

462 The mechanistic underpinnings for cell-autonomous circadian regulation of the translation  
463 and degradation machineries remain to be fully explored, but are likely to be driven by daily  
464 rhythms in the activity of mTORC: a key regulator of protein synthesis and degradation as  
465 well as macromolecular crowding and sequestration (Stangherlin *et al*, 2021b, 2021a; Cao,  
466 2018; Adegoke *et al*, 2019; Ben-Sahra & Manning, 2017; Delarue *et al*, 2018). In particular,  
467 global protein synthesis rates are greatest when mTORC1 activity is highest, in tissues and  
468 cultured cells, whereas pharmacological treatments that inhibit mTORC1 activity reduce  
469 daily variation in crowding and protein synthesis rates (Feeney *et al*, 2016a; Lipton *et al*,  
470 2015; Stangherlin *et al*, 2021b). Given our focus on proteomic flux and translation-  
471 associated protein quality control, autophagy was not directly within the scope of this study  
472 but is also mTORC-regulated and subject to daily regulation (Ma *et al*, 2011; Ryzhikov *et al*,  
473 2019). *In vivo*, daily regulation of mTORC activity arises primarily through growth factor  
474 signalling associated with daily feed/fast cycles (Crosby *et al*, 2019; Byles *et al*, 2021). The  
475 mechanisms facilitating cell-autonomous circadian mTORC activity rhythms are incompletely  
476 understood but may include Mg.ATP availability (Feeney *et al*, 2016a) and its direct  
477 regulation by PERIOD2 (Wu *et al*, 2019). This will be an important area for future work.

478

479 Increased translation will inevitably be associated with increased production of defective  
480 translation products, such as prematurely terminated or misfolded peptides that must be  
481 rapidly cleared by ubiquitin-proteasome system-mediated degradation (Dimitrova *et al*,

482 2009; Wang *et al*, 2013; Gandin & Topisirovic, 2014). Proteome-wide cycling ubiquitination  
483 sites have been recently described (Hansen *et al*, 2021); here we present evidence of cell-  
484 autonomous circadian rhythms of proteasome activity and rhythmic turnover for a greater  
485 proportion of the proteome than oscillates in abundance. Accordingly, temporal  
486 coordination was found for the synthesis of heteromeric protein complexes, in particular  
487 the ribosome, the most abundant protein complex in most mammalian cells. This highlights  
488 how, even though most mammalian proteins exhibit half-lives >24h and show little daily  
489 variation in abundance, the rate at which they are replaced can be subject to circadian  
490 regulation. This may be particularly beneficial for heteromeric complex assembly. Within  
491 the MMC fraction, we observed enrichment for specific biological functions at different  
492 times of the day, e.g., ribonucleoprotein assembly vs actin polymerisation. While bulk  
493 measurements showed clear coordination on the global scale, data from whole-cell and  
494 fractionated proteomics suggest that a combination of rhythmic synthesis, degradation,  
495 crowding and sequestration acts in concert to temporally organise rhythmic  
496 macromolecular biogenesis and assembly whilst minimising changes in overall proteome  
497 composition.

498

499 More insight into the relationship between temporal organisation and proteostasis can be  
500 gained by comparing our findings with other model systems. For example, we recently  
501 found chronic proteostasis imbalance in cells and tissues deficient for the *Cry1* and *Cry2*  
502 genes, without which circadian regulation of transcription does not persist. These cells  
503 exhibit increased proteotoxic stress as well as increased circadian variation in proteome  
504 composition compared with wild-type controls (Wong *et al*, 2022). Moreover, the temporal  
505 compartmentalisation of proteome renewal processes has a clear precedent in yeast, where  
506 metabolic oscillations arise as a direct consequence of TORC-dependent cycles of protein  
507 synthesis and sequestration that are critical for preventing deleterious protein aggregation  
508 (O'Neill *et al*, 2020). In light of similar findings in the alga *Ostreococcus tauri* (Kay *et al*,  
509 2021; Feeney *et al*, 2016a), we speculate that promoting and minimising the energetic cost  
510 of proteostasis may be an evolutionarily conserved function of circadian and related  
511 biological rhythms.

512

513 Beyond testing two key predictions in mouse liver, a limitation is that this study was  
514 restricted to quiescent primary mouse fibroblasts. In our experience, fibroblasts are a  
515 particularly powerful and predictive model for fundamental principles of cellular circadian  
516 regulation (Hoyle *et al*, 2017). Clearly though, in future it will be necessary to extend our  
517 initial findings of protein turnover *in vivo* to fully validate that daily rhythms of protein  
518 turnover and proteome renewal occur under natural conditions (daily light/dark, feed/fast,  
519 rest/activity cycles). We predict that they will be observed across multiple mature tissues,  
520 with higher amplitude than cultured cells due to amplification of cell-intrinsic processes by  
521 daily systemic cues (hormonal and body temperature rhythms). We anticipate that the  
522 relative phases of synthesis and degradation rhythms will likely differ somewhat between  
523 tissues and physiological contexts, as recently found in growing muscle for example (Kalu *et*  
524 *al*, 2020).

525

526 Rhythms in transcription were not addressed in this study, but as discussed above, there is a  
527 well-established discrepancy between identities and phases of rhythmic proteins and their  
528 underlying transcript levels. Regulation at the translational level has been suggested to  
529 explain these differences, although ribosomal profiling studies have noted that on average  
530 there appears to be no delay between rhythmic transcript and nascent translation (Atger *et*  
531 *al*, 2015; Janich *et al*, 2015; Jang *et al*, 2015). We note, however, that ribosomal profiling  
532 reports on the level and position of ribosome-mRNA association, and so does not directly  
533 measure nascent protein production. Although a good correlate when comparing steady-  
534 state conditions, ribosome profiling also does not distinguish between active and stalled  
535 ribosomes, and does not reflect all the changes in protein synthesis that occur in dynamic  
536 cellular systems or upon perturbation that globally alter proteostasis (Liu *et al*, 2017). Upon  
537 finding evidence for global changes in protein synthesis and degradation throughout the  
538 day, the development of our pulsed SILAC method was crucial for allowing us direct insight  
539 into the regulation of protein abundance. Enabled by technological improvements in  
540 peptide detection accuracy and multiplexing, this is the first report of proteins tracked both  
541 across their lifetime (production) and across the circadian cycle. Moreover, our  
542 development of a simple pulse-labelling assay for nascent ribosome assembly likely has  
543 several applications beyond circadian research.

544

545 Finally, given the extensive links between proteome imbalance and many pathological  
546 states, daily regulation of protein metabolism has implications for health and disease.  
547 Circadian disruption is already strongly associated with impaired proteostasis, though causal  
548 mechanisms are poorly understood at this time (Bolitho *et al*, 2014; Musiek *et al*, 2018; Leng  
549 *et al*, 2019; Lipton *et al*, 2017; Wong *et al*, 2022). In this study we predicted and validated  
550 that daily turnover rhythms confer daily variation on the sensitivity of cells and tissues to a  
551 clinically relevant proteasome inhibitor. This highlights how preclinical models may help to  
552 accelerate the development of (chrono)therapies, that optimise treatment outcomes by  
553 leveraging understanding of the body's innate daily rhythms (Cederroth *et al*, 2019).  
554

555 **Methods**

556

557 ***Cell culture and general timecourse structure***

558 Fibroblasts originated from mice homozygous for PER2::LUCIFERASE (Yoo *et al*, 2004),  
559 isolated from lung tissue and were immortalised by serial passaging as described previously  
560 (Seluanov *et al*, 2010). For routine culture, cells were maintained at 37°C and 5% CO<sub>2</sub> in  
561 Gibco™ high glucose Dulbecco's Modified Eagle Medium (DMEM), supplemented with 100  
562 units/ml penicillin and 100 µg/ml streptomycin, as well as 10% Hyclone™ III FetalClone™  
563 bovine serum (GE Healthcare). When plated for experiments, cells were grown to  
564 confluence prior to the start of assaying, which ensures contact inhibition and elimination of  
565 cell division effects during the experiments (Hoyle *et al*, 2017; Ribatti, 2017).

566

567 For all the timecourse experiments, cells were subject to temperature entrainment,  
568 consisting of 12h:12h cycles of 32°C:37°C, for at least 4 days prior to the start of assaying,  
569 with media changes if required. Unless stated otherwise, the final medium change,  
570 containing 10% serum, occurred at the anticipated transition from 37°C to 32°C, as the cells  
571 were transferred to constant 37°C. This is denoted as experimental time t=0, or start of  
572 constant conditions. Sampling began at least 24h afterwards (i.e. t=24+), to avoid any  
573 transient effects of the last serum-containing medium change and temperature shift  
574 (Balsalobre *et al*, 1998; Buhr *et al*, 2010; Beale *et al*, 2023b). Parallel recording of  
575 PER2::LUCIFERASE activity were obtained using ALLIGATOR (Cairn Research) (Crosby *et al*,  
576 2017), and luminescence quantified in Fiji/ImageJ v2.0 (Abramoff, 2007; Schindelin *et al*,  
577 2012).

578

579 ***Cell lysis and protein quantification***

580 For timecourse experiments requiring cell lysate collections, the procedure was based on  
581 the following. Cells were washed twice with PBS, and incubated with the indicated lysis  
582 buffers: normally either digitonin buffer (0.01% digitonin, 50 mM Tris pH 7.4, 5 mM EDTA,  
583 150 mM NaCl) for 10 min on ice or urea/thiourea buffer for 20 min at room temperature (7  
584 M urea, 2 M thiourea, 1% sodium deoxycholate, 20 mM Tris, 5 mM TCEP), both  
585 supplemented with protease and phosphatase inhibitor tablets (Roche, 4906845001 and  
586 04693159001) added shortly beforehand. Cells were then scraped, and lysates transferred

587 to Eppendorf tubes, before sonication with Bioruptor sonicator (Diagenode) at 4°C, for 2-3  
588 cycles 30 s on/30 s off. Lysates were then centrifuged at 14000 rpm for 5 min, and  
589 supernatant either flash frozen in liquid nitrogen for future use, or taken directly for further  
590 analysis. For determination of protein concentration, Pierce bicinchoninic acid assay (BCA)  
591 (Smith *et al*, 1985) was performed in microplate format according to manufacturer's  
592 instructions, with bovine serum albumin (BSA) protein standards diluted in the same lysis  
593 buffer as experimental samples. Pierce 660 nm assay was performed instead of BCA when  
594 samples contained thiourea.

595

### 596 ***<sup>35</sup>S pulse-chase labelling***

597 All procedures for <sup>35</sup>S pulse-chase were optimised to avoid methionine starvation, serum-  
598 containing media changes, and temperature perturbations, all of which could potentially  
599 reset circadian rhythms and obscure any cell-autonomous regulation. Fibroblasts were  
600 adapted to serum-free but otherwise complete medium starting from the last 4 days of  
601 temperature entrainment. At each timepoint, the cells were pulsed with 0.1 mCi/ml <sup>35</sup>S-L-  
602 methionine and <sup>35</sup>S-L-cysteine mix (EasyTag™ EXPRESS35S Protein Labeling Mix, Perkin  
603 Elmer) in methionine- and cysteine-free DMEM for 15 min. For chase, the radiolabel-  
604 containing media were replaced with standard DMEM supplemented with 2 mM (10x  
605 normal concentration) of non-radiolabelled methionine and cysteine, and cells incubated for  
606 1h. Throughout both pulse and chase the cells were maintained at 37°C. At the end of pulse  
607 and chase periods, cells were washed with ice-cold PBS and lysed in digitonin buffer (0.01%  
608 digitonin (Invitrogen), 50 mM Tris pH 7.4, 5 mM EDTA, 150 mM NaCl for 10 min on ice).  
609 Lysates were run on NuPage™ Novex™ 4-12% Bis-Tris protein gels; the gels were then  
610 stained with Coomassie SimplyBlue™ SafeStain (ThermoFisher). Gels were then dried at  
611 80°C for 45 min and exposed overnight to a storage phosphor screen (GE Healthcare, BAS-IP  
612 SR 2025), which was subsequently imaged with Typhoon FLA700 gel scanner and quantified  
613 in Fiji/ImageJ.

614

### 615 ***Puromycin labelling***

616 Puromycin dihydrochloride, diluted in PBS, alone or in combination with BTZ, was added  
617 directly to cells in culture medium, as 10x bolus to a final concentration of 1 µg/ml

618 puromycin and 1  $\mu$ M BTZ. Labelling proceeded for 30 min at 37°C, after which cells were  
619 lysed in a urea/thiourea buffer and puromycin detected by Western blotting.

620

### 621 ***AHA incorporation***

622 At each timepoint, while still maintaining cells at 37°C, complete DMEM medium was  
623 replaced with methionine-free DMEM supplemented with AHA in combination with  
624 methionine at 30:1 ratio (Bagert *et al*, 2014) – 1 mM AHA, 33  $\mu$ M Met - and 1% dialysed FBS  
625 for 90 min. Cells were lysed in digitonin buffer (HEPES rather than Tris-buffered). AHA-  
626 containing proteins were conjugated to biotin by click chemistry, by adding appropriate  
627 reagents (Jena Bioscience) to the lysates, to final concentrations of 1 mM THPTA, 1 mM  
628 CuSO<sub>4</sub>, 2 mM Na ascorbate, and 40  $\mu$ M biotin alkyne, and incubating for 1h at room  
629 temperature. Biotinylated proteins were then detected by Western blotting.

630

### 631 ***Western blotting***

632 Samples for denaturing polyacrylamide gel electrophoresis (SDS-PAGE) were prepared by  
633 diluting lysates with reduced NuPage™ LDS sample buffer and heating at 70°C for 10 min.  
634 Samples were run on NuPage™ Novex™ 4-12% Bis-Tris protein gels in MES buffer or on E-  
635 PAGE 8% 48-well gels (ThermoFisher). For native running conditions, NuPAGE Tris-Acetate  
636 3% - 8% gels were used, with buffers as per manufacturer's instructions.

637

638 For Western blotting for puromycin and AHA incorporation measurement,  
639 chemiluminescence detection was used. Proteins were transferred from the gels to  
640 nitrocellulose membranes using an iBlot system (ThermoFisher). Membranes were stained  
641 by Ponceau as control for total protein loading, then washed, blocked, and incubated with  
642 primary antibody in the blocking buffer at 4°C overnight. Anti-puromycin antibody (PMY-  
643 2A4-2 from Developmental Studies Hybridoma bank, at 1:1000) was used with 5% milk in  
644 TBST blocking buffer, and an anti-mouse HRP-conjugated secondary antibody, while AHA-  
645 biotin was detected using Strep-HRP antibody (R-1098-1 from EpiGentek at 1:2000) in 1%  
646 BSA, 0.2% Triton X100 PBS blocking buffer, with additional 10% BSA blocking step before  
647 detection. Immobilon reagents (Millipore) were used to detect chemiluminescence. Images  
648 were analysed by densitometry in ImageLab v4.1 (BioRad).

649

650 For Western blotting of total and p-eIF2 $\alpha$ , LICOR protocols and reagents were used. Briefly,  
651 methanol-activated PVDF-FL (Immobilon) membranes were utilised for transfer, and dried  
652 for 1h before blocking. After re-activation, membranes were blocked in Intercept TBS  
653 buffer. Primary (AHO0802 from ThermoFisher, ab32157 from Abcam, both at 1:1000) and  
654 secondary (IRDye 680RD and IRDye 800CW) antibodies were diluted in Intercept TBS buffer  
655 with addition of 0.2% Tween-20. Fluorescence was detected and quantified in Odyssey<sup>®</sup> CLx  
656 Imaging system.

657

### 658 ***Proteasome activity assays***

659 Cell-based ProteasomeGlo<sup>™</sup> chymotrypsin-like and trypsin-like assays (Promega) were  
660 performed according to manufacturer's instructions (Moravec *et al*, 2009) at multiple  
661 circadian timepoints as indicated. Briefly, cells in 96-well plates and the assay reagent were  
662 equilibrated to room temperature, before reagent addition, mixing, incubation for 10 min,  
663 and luminescence measurement with Tecan Spark 10M plate reader, with integration time  
664 of 1 s per well. For analysis, bioluminescence from negative control wells (containing only  
665 culture medium and the assay reagent, but no cells) was subtracted from all the  
666 experimental conditions.

667

### 668 ***Aggregation assays***

669 PROTEOSTAT<sup>®</sup> Aggresome Detection kit (Enzo Life Sciences) was used for detection of  
670 protein aggregates (Shen *et al*, 2011). Cells in 96-well plates were treated with MG132 (as  
671 indicated in the figure legends), added as 10x bolus diluted in serum-free DMEM to the pre-  
672 existing culture media, and gently titrated, to avoid cellular rhythms resetting. Cells were  
673 permeabilised and stained simultaneously with PROTEOSTAT<sup>®</sup> dye and Hoechst 33342, as  
674 per kit manufacturer's manual. Total fluorescence in blue and red channels, and  
675 representative images of individual wells were acquired using Tecan Spark Cyto plate  
676 reader.

677

### 678 ***Viability assays***

679 PrestoBlue<sup>™</sup> High Sensitivity reagent (ThermoFisher), a resazurin-based dye, was used to  
680 measure cellular viability (Boncler *et al*, 2014; Xu *et al*, 2015). Cells in 96-well plates were  
681 treated with drugs or DMSO (vehicle) controls, as indicated in figure legends, added as 10x



682 bolus diluted in serum-free DMEM on top of existing culture media. For drug washout in the  
683 timecourse experiments, cell medium was replaced with 1% serum DMEM, to allow  
684 recovery for 18 h. The assay was then performed in line with manufacturer's guidelines:  
685 following PrestoBlue reagent addition and incubation at 37°C for 20 min, fluorescence was  
686 measured in a Tecan Spark 10M plate reader, with excitation at 550 nm and emission at 600  
687 nm.

688

### 689 **General statistics**

690 Statistical tests were performed using GraphPad Prism (v8 and v9) and R v4, and are  
691 indicated in figure legends. *P* values are either reported in figures directly, or annotated  
692 with asterisks: \*  $p \leq 0.05$ ; \*\*  $p \leq 0.01$ , \*\*\*  $p \leq 0.001$ ; \*\*\*\*  $p \leq 0.0001$ , *ns* not significant,  
693  $p > 0.05$ . Number of replicates are reported as *n* or *N* (for technical and biological,  
694 respectively) in the figures; error bars represent standard error (SEM) unless stated  
695 otherwise. In cases where comparison of fits was performed, determining whether the data  
696 are better described by a straight line or a cosine wave with circadian period, the following  
697 equation was used for the latter:

$$y = (mx + c) + ae^{kx} \cos \frac{2\pi x - r}{p}$$

698 Where *m* is the baseline, *c* is the offset from 0 in *y*-axis, *a* is the amplitude, *k* is the damping  
699 rate, *r* is the phase, and *p* is the period, which was fixed at either 24 hours or 25 hours  
700 depending on the parallel PER2::LUC recording period.

701

702

### 703 **Proteomics data collection and analysis**

704

#### 705 **Cell culture and sample collection for pSILAC-TMT**

706 For pSILAC-TMT experiments, mouse lung fibroblasts were cultured in 10% dialysed FBS  
707 (dFBS). SILAC labelling was conducted in DMEM supplemented with 1% dialysed FBS and  
708 heavy-labelled amino acids instead of their light analogues, specifically 84 mg/L  $^{13}\text{C}_6$   $^{15}\text{N}_4$  L-  
709 Arginine and 146 mg/L  $^{13}\text{C}_6$   $^{15}\text{N}_2$  L-Lysine (Ong *et al*, 2002). In the first timecourse pSILAC  
710 experiment, sets of cells were labelled for 6h, every 6h over two days, and total cell lysates  
711 were extracted in urea/thiourea-based buffer (*n*=1 per timepoint). In the second timecourse

712 experiments, labelling was done for 1.5h, every 6h over two days in duplicates, and  
713 fractionation performed as described below. For the booster channel, a fully-heavy labelled  
714 sample was used, where cells were cultured in DMEM with heavy amino acids for 5  
715 passages (3-4 w) but otherwise processed in the same way as the timecourse samples.  
716 Fractionation was based on LOPIT-DC protocol (Geladaki *et al*, 2019). Two 15cm dishes per  
717 sample were used, cells were scraped in ice-cold PBS, centrifuged, and then lysed on ice by  
718 resuspension in a mild buffer (0.25M sucrose, 10mM HEPES pH 7.4, 2mM EDTA, 2mM  
719 magnesium acetate, protease inhibitors) and passed through a Dounce homogeniser.  
720 Lysates were moved to thick-wall ultracentrifuge tubes (Beckman 343778 11mm/34mm)  
721 and centrifuged at 79 000 *g* for 43 min to pellet membranes and organelles. Supernatant  
722 was then centrifuged again at 120 000 *g* for 45 min. Resulting pellet was resuspended in 8 M  
723 urea 20 mM Tris buffer, and processed for mass spectrometry analysis.

724

## 725 ***Mass spectrometry analysis***

### 726 *Protein digestion*

727 Protein samples were reduced with 5 mM DTT at 56°C for 30 min and alkylated with 10 mM  
728 iodoacetamide in the dark at room temperature for 30 min. The samples were then diluted  
729 to 3M urea and digested with Lys-C (Promega) for 4 h at 25°C. Next, the samples were  
730 further diluted to 1.6 M urea and were digested with trypsin (Promega) overnight, at 30°C.  
731 After digestion, an equal volume of ethyl acetate was added and acidified with formic acid  
732 (FA) to a final concentration of 0.5%, mixed by shaking for 3 min and centrifuged at 15700 *g*  
733 for 2 min. The top organic layer was removed and the bottom aqueous phase was desalted  
734 using home-made C18 stage tips (3M Empore) filled with porous R3 resin (Applied  
735 Biosystems). The stage tips were equilibrated with 80% acetonitrile (MeCN) and 0.5% FA,  
736 followed by 0.5% FA. Bound peptides were eluted with 30-80% MeCN and 0.5% FA and  
737 lyophilized.

738

### 739 *Tandem mass tag (TMT) labelling*

740 Dried peptide mixtures (50 µg) from each condition were resuspended in 24 µl of 200 mM  
741 HEPES, pH 8.5. 12 µl (300 µg) TMTpro 16plex or 18plex reagent (ThermoFisher)  
742 reconstituted according to manufacturer's instructions was added and incubated at room

743 temperature for 1 h. The labelling reaction was then terminated by incubation with 2.2  $\mu$ l  
744 5% hydroxylamine for 30 min. The labelled peptides were pooled into a single sample and  
745 desalted using the same stage tips method as above.

746

#### 747 *Off-line high pH reverse-phase peptides fractionation*

748 200  $\mu$ g of the labelled peptides were separated on an off-line, high pressure liquid  
749 chromatography (HPLC). The experiment was carried out using XBridge BEH130 C18, 5  $\mu$ m,  
750 2.1 x 150 mm column (Waters), connected to an Ultimate 3000 analytical HPLC (Dionex).  
751 Peptides were separated with a gradient of 1-90% buffer A and B (A: 5% MeCN, 10 mM  
752 ammonium bicarbonate, pH8; B: MeCN, 10 mM ammonium bicarbonate, pH8, [9:1]) in 60  
753 min at a flow rate of 250  $\mu$ l/min. A total of 54 fractions were collected, which were then  
754 combined into 18 fractions and lyophilized. Dried peptides were resuspended in 1% MeCN  
755 and 0.5% FA, and desalted using C18 stage tips, ready for mass spectrometry analysis.

756

#### 757 *Mass spectra acquisition*

758 The fractionated peptides were analysed by LC-MS/MS using a fully automated Ultimate  
759 3000 RSLC nano System (ThermoFisher) fitted with a 100  $\mu$ m x 2 cm PepMap100 C18 nano  
760 trap column and a 75  $\mu$ m x 25 cm, nanoEase M/Z HSS C18 T3 column (Waters). Peptides were  
761 separated by a non-linear gradient of 120 min, 6-38% buffer B (80% MeCN, 0.1% FA). Eluted  
762 peptides were introduced directly via a nanoFlex ion source into an Orbitrap Eclipse mass  
763 spectrometer (ThermoFisher). Data were acquired using FAIMS-Pro device, running  
764 MS3\_RTS analysis, switching between two compensation voltages (CV) of -50 and -70 V.

765 MS1 spectra were acquired using the following settings: R = 120K; mass range = 400-1400  
766 m/z; AGC target = 4e5; MaxIT = 50 ms. Charge states 2-5 were included and dynamic  
767 exclusion was set at 60 s. MS2 analysis were carried out with collision induced dissociation  
768 (CID) activation, ion trap detection, AGC = 1e4, MaxIT = 35 ms, CE = 34%, and isolation  
769 window = 0.7 m/z. RTS-SPS-MS3 was set up to search Uniport *Mus musculus* proteome  
770 (2021), with fixed modifications cysteine carbamidomethylation and TMTpro at the peptide  
771 N-terminal. TMTpro K, Arg10 (R +10.008), TMTpro K+K8 (K +312.221) and methionine  
772 oxidation were set as dynamic modifications. Missed cleavages were allowed, and maximum

773 variable modifications was set at 3. In MS3 scans, the selected precursors were fragmented  
774 by high-collision dissociation (HCD), and analysed using the orbitrap with the following  
775 settings: isolation window = 0.7 m/z, NCE = 55, orbitrap resolution = 50K, scan range = 110-  
776 500 m/z, MaxIT = 200ms, and AGC = 1e5.

777

#### 778 *Raw MS data processing*

779 The acquired 18 raw files from LC-MS/MS were each split into two individual spectra, one  
780 with CV = -50V and one with CV = -70V, total 36 files, using FreeStyle software  
781 (ThermoFisher). These files were then processed using MaxQuant (Cox & Mann, 2008) with  
782 the integrated Andromeda search engine (v1.6.17.0). MS/MS spectra were quantified with  
783 reporter ion MS3 from TMTpro experiments and searched against UniProt *Mus musculus*  
784 Reviewed (Nov 2020) Fasta databases. Carbamidomethylation of cysteines was set as a fixed  
785 modification, while methionine oxidation, N-terminal acetylation, Arg10 and Lys8 were set  
786 as variable modifications.

787

#### 788 ***Data analysis***

789 After the MaxQuant search, all subsequent proteomics data processing and analysis was  
790 performed in R (v3.6.1 and v4.1.2) with R Studio v1.2. The custom scripts are available via a  
791 github repository, at <https://github.com/estere-sei/circadian-pSILAC>

792

793 Peptide level information from MaxQuant (evidence.txt output file) was used as a starting  
794 point. Contaminants and reverse hits were removed. Peptides were classified according to  
795 their labelling state: those that had at least one heavy arginine (Arg10) or lysine (Lys8) were  
796 classified as “heavy”, and the rest were classified as “light”. Entries for peptides with  
797 identical sequences in the same labelling state were grouped together (i.e. their reporter  
798 ion intensities across the 16 TMT channels were summed up), including peptides with other  
799 modifications such as methionine oxidation. Peptides with missing values were excluded.  
800 Total heavy label incorporation was quantified as overall proportion of summed intensities  
801 of heavy peptides over total summed intensities per TMT channel. Sample loading  
802 normalisation was performed, applying a scaling factor to equalise total summed intensity  
803 across TMT channels.

804

805 Peptides were filtered to leave only those that were detected in both heavy and light form.  
806 Peptide intensities belonging to the same leading razor protein accession were summed up  
807 to get total protein abundance value, while the sum of heavy peptides only for each protein  
808 represented the amount of synthesis. The ratio of heavy to total protein intensity averaged  
809 across the 8 timepoints was used to estimate relative turnover.

810

811 Several methods were used to assess the likelihood of significant circadian change over time  
812 in proteins' total abundance and synthesis, including Rhythmicity Analysis Incorporating  
813 Non-parametric Methods (RAIN) (Thaben & Westermark, 2014) and ANOVA. With RAIN, the  
814 data were tested for rhythms with period length of 24 h. For ANOVA, the data were log-  
815 transformed, and two days of sampling were treated as replicates. Oscillation phase was  
816 taken from RAIN outputs, and represented circadian time of the peak of oscillation, where  
817 time 0 is equivalent to the peak of PER2::LUC from parallel recordings. The extent of change  
818 over time is expressed as fold-change, taking average ratio of peak to trough intensity  
819 values across the two days of sampling.

820

821 For protein complex membership analysis, a list was taken from Ori *et al.*, 2016 which  
822 combined CORUM, COMPLEAT and manually annotated complexes and their subunits (Ori  
823 *et al.*, 2016; Giurgiu *et al.*, 2019; Vinayagam *et al.*, 2013). Ensembl gene identifiers were  
824 converted from human to mouse by g:Profiler g:Orth tool (Raudvere *et al.*, 2019), and  
825 matched with detected proteins. To assess variability of complex turnover, an analysis similar  
826 to one in Mathieson *et al.*, 2018 was performed: standard deviation of the average relative  
827 turnover was calculated between proteins belonging to each detected complex, taking only  
828 complexes with more than 4 subunits, and compared to a dataset of the same size and  
829 structure but with proteins chosen randomly from all detected proteins (i.e. same number  
830 of complexes with same number of subunits as in annotated data but "subunits" chosen by  
831 random sampling).

832

833 For gene ontology functional enrichment analysis, GOrilla tool was used (Eden *et al.*, 2009),  
834 comparing target protein list with all detected proteins as background, and setting FDR q-  
835 value cutoff at 0.05. REVIGO (0.4) was used to remove redundant terms. For analysis of

836 protein-protein interactions, STRING web app was used (Szklarczyk *et al*, 2021), filtering for  
837 high-confidence physical interactions, and looking for enrichment against the background of  
838 detected proteins.

839

#### 840 ***Mouse tissue experiments***

841 All animal work was licensed by the Home Office under the Animals (Scientific Procedures)  
842 Act 1986, with Local Ethical Review by the Medical Research Council and the University of  
843 Cambridge, UK. Throughout the experiments, wild-type C57 mice were housed in 12:12 h  
844 light:dark conditions.

845

846 For *in vivo* turnover measurements, mice received i.p. injections of either 40  $\mu\text{mol/kg}$   
847 puromycin (Ravi *et al*, 2020, 2018; Schmidt *et al*, 2009), or 40  $\mu\text{mol/kg}$  puromycin in  
848 combination with 2.5 mg/kg BTZ (Apex Bio). Both solutions were sterile-filtered in PBS with  
849 1% DMSO. Animals were culled 45 min after, in the same order as injected, and livers  
850 collected and flash frozen in liquid nitrogen. The procedure was performed twice on the  
851 same day, 1 h after the transition from dark to light (ZT1), and 1 h after the transition from  
852 light to dark (ZT13). Four age-matched male mice were used per condition.

853

854 For *in vivo* response to proteotoxic stress measurements, mice received i.p. injections of 2.5  
855 mg/kg BTZ (Apex Bio) or vehicle control (1% DMSO in PBS, sterile-filtered). Animals were  
856 culled 5 h after, in the same order as injected, and livers collected and flash frozen in liquid  
857 nitrogen. Injections were performed twice on the same day, 1 h after the transition from  
858 dark to light (ZT1), and 1 h after the transition from light to dark (ZT13). 6 age-matched male  
859 mice were used per condition.

860

861 Tissues were homogenised in urea/thiourea lysis buffers in Precellys 24 Tissue Homogeniser  
862 (Bertin Instruments), using CK14 ceramic beads, for 3 x 15 s at 5000 rpm with 30 s breaks.  
863 Lysates were then cleared by centrifugation at 14000 rpm for 5 min, followed by protein  
864 sample preparation and Western blotting as previously described.

865

#### 866 ***Edmondson assay for nascent rRNA labelling***

867

868 At each timepoint, whilst maintaining fibroblasts at constant 37°C, 200 µM isotopically  
869 heavy uridine (<sup>15</sup>N<sub>2</sub>, Cambridge Isotope Laboratories) was spiked into media for 6 h to label  
870 nascently transcribed RNA. After labelling, cells were harvested by trypsinisation, and  
871 pellets immediately flash frozen and stored at -70 °C.

872

873 For ribosome extraction, each cell pellet was resuspended in 200 µl of lysis buffer (40 mM  
874 HEPES-KOH (pH 7.5), 75 mM KOAc-HOAc, 5 mM Mg(OAc)<sub>2</sub>-HOAc, 1 mM CaCl<sub>2</sub>, 10 µM  
875 Zn(OAc)<sub>2</sub>-HOAc, 2 mM spermidine, 5 mM dithiothreitol, 1% v/v Triton X-100) and sonicated  
876 at 4 °C for 5 min (30 s on; 30 s off). To each lysate, 2 µl of micrococcal nuclease (Nuclease  
877 S7, Roche) was added and the lysates were incubated at 25 °C for 18 min using a thermal  
878 cycler (Techne-Prime, Cole-Parmer). Processed lysates were immediately flash-frozen in  
879 liquid nitrogen and stored at -70 °C.

880

881 Ribosomal RNA samples and cell pellets for total RNA extraction were resuspended in 'RLT  
882 Buffer' and RNA extracted and purified using the RNeasy Mini kit (Qiagen, 74004) according  
883 to the manufacturer's instructions, including the on-column DNase-treatment (Qiagen,  
884 79254). RNA was then further purified via an overnight ethanol precipitation at -20 °C, and  
885 RNA pellets resuspended in pre-heated 'Physiological Buffer' (50 mM HEPES-KOH (pH 7.5),  
886 100 mM KOAc-HOAc, 20 mM Mg(OAc)<sub>2</sub>-HOAc). RNA was then degraded into single  
887 nucleotides by overnight room temperature incubation with micrococcal nuclease (Nuclease  
888 S7, Roche) supplemented with 1 mM CaCl<sub>2</sub>. The digestion reaction was then terminated by  
889 flash-freezing, and samples stored at -70°C.

890

#### 891 ***LC-MS analysis of UMP and heavy UMP in RNA lysates***

892

893 10 µl of RNA lysate was diluted in 40 µl of 10 mM ammonium acetate and transferred to a  
894 96 well skirted PCR plate (Starlab International, Hamburg, Germany) and covered with a  
895 silicone sealing mat (Axyomat, Salt Lake City, Utah, USA) prior to mixed mode LC-MS analysis  
896 using an ACE Excel C18-PFP (pentafluorophenyl) column (150 × 2.1 mm, 2.0 µm, Hichrom,  
897 Reading, Berkshire, UK). Mobile phase A consisted of water with 0.1% formic acid with 10  
898 mM ammonium formate and mobile phase B was acetonitrile with 0.1% formic acid. For  
899 gradient elution mobile phase B was held at 0% for 1.6 min. followed by a linear gradient to

900 30% B over 4.0 minutes, a further increase to 90% over 1 min. and a hold at 90% B for 1 min.  
901 with re-equilibration for 1.5 minutes giving a total run time of 6.5 minutes. The flow rate  
902 was 0.5 mL/min and the injection volume was 3  $\mu$ L. The needle wash used was 1:1 water:  
903 acetonitrile.

904 For MS analysis using the Q Exactive Plus (ThermoFisher Scientific, Hemel Hempstead,  
905 Hertfordshire, UK) a full scan of 60-900 m/z was used at a resolution of 70,000 ppm in  
906 positive ion mode. The source parameters were as follows: an auxiliary gas temperature of  
907 450°C, a capillary temperature of 275 °C, an ion spray voltage of 3.5 kV and a sheath gas,  
908 auxiliary gas and sweep gas of 55, 15 and 3 arbitrary units respectively.

909

910 Samples were analysed using Xcalibur (ThermoFisher, Version 4.2) and processed and  
911 integrated using the Qual Browser and Quan Browser tools within Xcalibur to target specific  
912 analytes. Data were expressed as area ratios between areas of extracted ion  
913 chromatograms of UMP (m/z 325.0431) against 15N2 UMP (m/z 327.0372) and all  
914 identifications of compounds were carried out using reference of the accurate mass and  
915 verified using standards purchased from Sigma Aldrich.

916

### 917 **Acknowledgements**

918 We thank all members of O'Neill lab, Rachel Edgar, Manu Hegde and Szymon Juskiewicz for  
919 valuable feedback and discussions, as well as Kathryn Lilley and Holger Kramer for advice on  
920 proteomics. We also thank biomedical technical staff at Medical Research Council (MRC)  
921 Ares facility and LMB facilities for assistance. NMR was supported by the Medical Research  
922 Council (MR/S022023/1). JON was supported by the Medical Research Council  
923 (MC\_UP\_1201/4).

924

### 925 **Author contributions**

926 ES and JON designed the study, analysed the data and wrote the manuscript with assistance  
927 from JM and ADB; SYP-C and JW performed mass spectrometry; NMR, AZ and JON  
928 performed mouse studies; ES, AE, AZ and NRJ performed cell experiments; DCSW, JM and  
929 ADB provided further experimental assistance and valuable intellectual contributions. All  
930 authors commented on the manuscript.

931



932 **References**

933

934

935

936 Abramoff M (2007) ImageJ as an Image Processing Tool and Library. *Microscopy and*  
937 *Microanalysis* 13

938 Adegoke OAJ, Beatty BE, Kimball SR & Wing SS (2019) Interactions of the super complexes:  
939 When mTORC1 meets the proteasome. *The International Journal of Biochemistry & Cell*  
940 *Biology* 117: 105638

941 Albornoz N, Bustamante H, Soza A & Burgos P (2019) Cellular Responses to Proteasome  
942 Inhibition: Molecular Mechanisms and Beyond. *International Journal of Molecular*  
943 *Sciences* 20: 3379

944 An H & Harper JW (2020) Ribosome Abundance Control Via the Ubiquitin–Proteasome  
945 System and Autophagy. *J Mol Biol* 432: 170–184

946 Andreani TS, Itoh TQ, Yildirim E, Hwangbo D-S & Allada R (2015) Genetics of Circadian  
947 Rhythms. *Sleep Medicine Clinics* 10: 413–421

948 Atger F, Gobet C, Marquis J, Martin E, Wang J, Weger B, Lefebvre G, Descombes P, Naef F &  
949 Gachon F (2015) Circadian and feeding rhythms differentially affect rhythmic mRNA  
950 transcription and translation in mouse liver. *Proc National Acad Sci* 112: E6579–E6588

951 Atger F, Mauvoisin D, Weger B, Gobet C & Gachon F (2017) Regulation of Mammalian  
952 Physiology by Interconnected Circadian and Feeding Rhythms. *Frontiers in Endocrinology*  
953 8

954 Balsalobre A, Damiola F & Schibler U (1998) A Serum Shock Induces Circadian Gene  
955 Expression in Mammalian Tissue Culture Cells. *Cell* 93: 929–937

956 Beale AD, Hayter EA, Crosby P, Valekunja UK, Edgar RS, Chesham JE, Maywood ES, Labeed  
957 FH, Reddy AB, Wright KP, *et al* (2023a) Mechanisms and physiological function of daily  
958 haemoglobin oxidation rhythms in red blood cells. *EMBO J*: e114164

959 Beale AD, Rzechorzek NM, Mihut A, Zeng A, Smyllie NJ, Pilorz V, Richardson R, Bertlesen MF,  
960 James NR, Fazal SV, *et al* (2023b) Thermosensitivity of translation underlies the  
961 mammalian nocturnal-diurnal switch. *bioRxiv*: 2023.06.22.546020

962 Ben-Sahra I & Manning BD (2017) mTORC1 signaling and the metabolic control of cell  
963 growth. *Current Opinion in Cell Biology* 45: 72–82

964 Blobel G & Potter VR (1967) Studies on free and membrane-bound ribosomes in rat liver I.  
965 Distribution as related to total cellular RNA. *J Mol Biol* 26: 279–292

- 966 Bolitho SJ, Naismith SL, Rajaratnam SMW, Grunstein RR, Hodges JR, Terpening Z, Rogers N &  
967 Lewis SJG (2014) Disturbances in melatonin secretion and circadian sleep–wake  
968 regulation in Parkinson disease. *Sleep Medicine* 15: 342–347
- 969 Boncler M, Różalski M, Krajewska U, Podśędek A & Watala C (2014) Comparison of  
970 PrestoBlue and MTT assays of cellular viability in the assessment of anti-proliferative  
971 effects of plant extracts on human endothelial cells. *Journal of Pharmacological and*  
972 *Toxicological Methods* 69: 9–16
- 973 Brooks TG, Manjrekar A, Mrc̣ela A & Grant GR (2023) Meta-analysis of Diurnal  
974 Transcriptomics in Mouse Liver Reveals Low Repeatability of Rhythm Analyses. *J Biol*  
975 *Rhythm*: 7487304231179600
- 976 Buchan JR & Parker R (2009) Eukaryotic Stress Granules: The Ins and Outs of Translation.  
977 *Molecular Cell* 36: 932–941
- 978 Buhr ED, Yoo S-H & Takahashi JS (2010) Temperature as a Universal Resetting Cue for  
979 Mammalian Circadian Oscillators. *Science* 330: 379–385
- 980 Buttgerit F & Brand MD (1995) A hierarchy of ATP-consuming processes in mammalian  
981 cells. *Biochemical Journal* 312: 163–167
- 982 Byles V, Cormerais Y, Kalafut K, Barrera V, Hallett JEH, Sui SH, Asara JM, Adams CM, Hoxhaj  
983 G, Ben-Sahra I, *et al* (2021) Hepatic mTORC1 signaling activates ATF4 as part of its  
984 metabolic response to feeding and insulin. *Mol Metab* 53: 101309
- 985 Cao R (2018) mTOR Signaling, Translational Control, and the Circadian Clock. *Frontiers in*  
986 *Genetics* 9
- 987 Cederroth CR, Albrecht U, Bass J, Brown SA, Dyhrfeld-Johnsen J, Gachon F, Green CB,  
988 Hastings MH, Helfrich-Förster C, Hogenesch JB, *et al* (2019) Medicine in the Fourth  
989 Dimension. *Cell Metabolism* 30: 238–250
- 990 Cox J & Mann M (2008) MaxQuant enables high peptide identification rates, individualized  
991 p.p.b.-range mass accuracies and proteome-wide protein quantification. *Nature*  
992 *Biotechnology* 26: 1367–1372
- 993 Cox KH & Takahashi JS (2019) Circadian clock genes and the transcriptional architecture of  
994 the clock mechanism. *Journal of Molecular Endocrinology* 63: R93–R102
- 995 Crosby P, Hamnett R, Putker M, Hoyle NP, Reed M, Karam CJ, Maywood ES, Stangherlin A,  
996 Chesham JE, Hayter EA, *et al* (2019) Insulin/IGF-1 Drives PERIOD Synthesis to Entrain  
997 Circadian Rhythms with Feeding Time. *Cell* 177: 896-909.e20
- 998 Crosby P, Hoyle NP & O’Neill JS (2017) Flexible Measurement of Bioluminescent Reporters  
999 Using an Automated Longitudinal Luciferase Imaging Gas- and Temperature-optimized  
1000 Recorder (ALLIGATOR). *J Vis Exp*

- 1001 Dantuma NP & Lindsten K (2010) Stressing the ubiquitin-proteasome system. *Cardiovascular*  
1002 *Research* 85: 263–271
- 1003 Delarue M, Brittingham GP, Pfeffer S, Surovtsev IV, Pinglay S, Kennedy KJ, Schaffer M,  
1004 Gutierrez JI, Sang D, Poterewicz G, *et al* (2018) mTORC1 Controls Phase Separation and  
1005 the Biophysical Properties of the Cytoplasm by Tuning Crowding. *Cell* 174: 338-349.e20
- 1006 Deshaies RJ (2014) Proteotoxic crisis, the ubiquitin-proteasome system, and cancer therapy.  
1007 *BMC Biology* 12
- 1008 Desvergne A, Ugarte N, Radjei S, Gareil M, Petropoulos I & Friguet B (2016) Circadian  
1009 modulation of proteasome activity and accumulation of oxidized protein in human  
1010 embryonic kidney HEK 293 cells and primary dermal fibroblasts. *Free Radical Biology and*  
1011 *Medicine* 94: 195–207
- 1012 Dibner C, Schibler U & Albrecht U (2010) The Mammalian Circadian Timing System:  
1013 Organization and Coordination of Central and Peripheral Clocks. *Annu Rev Physiol* 72:  
1014 517–549
- 1015 Dieterich DC, Link AJ, Graumann J, Tirrell DA & Schuman EM (2006) Selective identification  
1016 of newly synthesized proteins in mammalian cells using bioorthogonal noncanonical  
1017 amino acid tagging (BONCAT). *Proc Natl Acad Sci* 103: 9482–9487
- 1018 Dimitrova LN, Kuroha K, Tatematsu T & Inada T (2009) Nascent Peptide-dependent  
1019 Translation Arrest Leads to Not4p-mediated Protein Degradation by the Proteasome.  
1020 *Journal of Biological Chemistry* 284: 10343–10352
- 1021 Doherty MK, Hammond DE, Clague MJ, Gaskell SJ & Beynon RJ (2009) Turnover of the  
1022 Human Proteome: Determination of Protein Intracellular Stability by Dynamic SILAC.  
1023 *Journal of Proteome Research* 8: 104–112
- 1024 Eden E, Navon R, Steinfeld I, Lipson D & Yakhini Z (2009) GOrilla: a tool for discovery and  
1025 visualization of enriched GO terms in ranked gene lists. *BMC Bioinformatics* 10
- 1026 Feeney KA, Hansen LL, Putker M, Olivares-Yañez C, Day J, Eades LJ, Larrondo LF, Hoyle NP,  
1027 O’Neill JS & Ooijen G van (2016a) Daily magnesium fluxes regulate cellular timekeeping  
1028 and energy balance. *Nature* 532: 375–379
- 1029 Feeney KA, Putker M, Brancaccio M & O’Neill JS (2016b) In-depth Characterization of Firefly  
1030 Luciferase as a Reporter of Circadian Gene Expression in Mammalian Cells. *J Biol Rhythm*  
1031 31: 540–550
- 1032 Gandin V & Topisirovic I (2014) Co-translational mechanisms of quality control of newly  
1033 synthesized polypeptides. *Translation* 2: e28109
- 1034 Geladaki A, Britovšek NK, Breckels LM, Smith TS, Vennard OL, Mulvey CM, Crook OM, Gatto  
1035 L & Lilley KS (2019) Combining LOPIT with differential ultracentrifugation for high-  
1036 resolution spatial proteomics. *Nature Communications* 10

- 1037 Gerber A, Esnault C, Aubert G, Treisman R, Pralong F & Schibler U (2013) Blood-Borne  
1038 Circadian Signal Stimulates Daily Oscillations in Actin Dynamics and SRF Activity. *Cell* 152:  
1039 492–503
- 1040 Giurgiu M, Reinhard J, Brauner B, Dunger-Kaltenbach I, Fobo G, Frishman G, Montrone C &  
1041 Ruepp A (2019) CORUM: the comprehensive resource of mammalian protein  
1042 complexes—2019. *Nucleic Acids Research* 47: D559–D563
- 1043 Hansen FM, Tanzer MC, Brüning F, Bludau I, Stafford C, Schulman BA, Robles MS, Karayel O  
1044 & Mann M (2021) Data-independent acquisition method for ubiquitinome analysis  
1045 reveals regulation of circadian biology. *Nat Commun* 12: 254
- 1046 Harper JW & Bennett EJ (2016) Proteome complexity and the forces that drive proteome  
1047 imbalance. *Nature* 537: 328–338
- 1048 Hipp MS, Kasturi P & Hartl FU (2019) The proteostasis network and its decline in ageing.  
1049 *Nature Reviews Molecular Cell Biology* 20: 421–435
- 1050 Hoyle NP, Seinkmane E, Putker M, Feeney KA, Krogager TP, Chesham JE, Bray LK, Thomas  
1051 JM, Dunn K, Blaikley J, *et al* (2017) Circadian actin dynamics drive rhythmic fibroblast  
1052 mobilization during wound healing. *Sci Transl Med* 9: eaal2774
- 1053 Hughes ME, Abruzzi KC, Allada R, Anafi R, Arpat AB, Asher G, Baldi P, Bekker C de, Bell-  
1054 Pedersen D, Blau J, *et al* (2017) Guidelines for Genome-Scale Analysis of Biological  
1055 Rhythms. *J Biol Rhythm* 32: 380–393
- 1056 Jang C, Lahens NF, Hogenesch JB & Sehgal A (2015) Ribosome profiling reveals an important  
1057 role for translational control in circadian gene expression. *Genome Res* 25: 1836–1847
- 1058 Janich P, Arpat AB, Castelo-Szekely V, Lopes M & Gatfield D (2015) Ribosome profiling  
1059 reveals the rhythmic liver transcriptome and circadian clock regulation by upstream open  
1060 reading frames. *Genome Res* 25: 1848–1859
- 1061 Jiang H-Y & Wek RC (2005) Phosphorylation of the  $\alpha$ -Subunit of the Eukaryotic Initiation  
1062 Factor-2 (eIF2 $\alpha$ ) Reduces Protein Synthesis and Enhances Apoptosis in Response to  
1063 Proteasome Inhibition. *Journal of Biological Chemistry* 280: 14189–14202
- 1064 Jouffe C, Cretenet G, Symul L, Martin E, Atger F, Naef F & Gachon F (2013) The Circadian  
1065 Clock Coordinates Ribosome Biogenesis. *Plos Biol* 11: e1001455
- 1066 Juszkievicz S & Hegde RS (2018) Quality Control of Orphaned Proteins. *Molecular Cell* 71:  
1067 443–457
- 1068 Karki S, Castillo K, Ding Z, Kerr O, Lamb TM, Wu C, Sachs MS & Bell-Pedersen D (2020)  
1069 Circadian clock control of eIF2 $\alpha$  phosphorylation is necessary for rhythmic translation  
1070 initiation. *Proc National Acad Sci* 117: 10935–10945

- 1071 Kay H, Grünewald E, Feord HK, Gil S, Peak-Chew SY, Stangherlin A, O'Neill JS & Ooijen G van  
1072 (2021) Deep-coverage spatiotemporal proteome of the picoeukaryote *Ostreococcus tauri*  
1073 reveals differential effects of environmental and endogenous 24-hour rhythms. *Commun*  
1074 *Biology* 4: 1147
- 1075 Kelu JJ, Pipalia TG & Hughes SM (2020) Circadian regulation of muscle growth independent  
1076 of locomotor activity. *Proceedings of the National Academy of Sciences* 117: 31208–  
1077 31218
- 1078 Klann K, Tascher G & Münch C (2020) Functional Translatome Proteomics Reveal Converging  
1079 and Dose-Dependent Regulation by mTORC1 and eIF2 $\alpha$ . *Mol Cell* 77: 913-925.e4
- 1080 Labbadia J & Morimoto RI (2015) The Biology of Proteostasis in Aging and Disease. *Annual*  
1081 *Review of Biochemistry* 84: 435–464
- 1082 Laccina JR, Marks OA, Liu X, Reid DW, Jagannathan S & Nicchitta CV (2012) Premature  
1083 Translational Termination Products Are Rapidly Degraded Substrates for MHC Class I  
1084 Presentation. *PLoS ONE* 7: e51968
- 1085 Lane N & Martin W (2010) The energetics of genome complexity. *Nature* 467: 929–934
- 1086 Leng Y, Musiek ES, Hu K, Cappuccio FP & Yaffe K (2019) Association between circadian  
1087 rhythms and neurodegenerative diseases. *The Lancet Neurology* 18: 307–318
- 1088 Lipton JO, Boyle LM, Yuan ED, Hochstrasser KJ, Chifamba FF, Nathan A, Tsai PT, Davis F &  
1089 Sahin M (2017) Aberrant Proteostasis of BMAL1 Underlies Circadian Abnormalities in a  
1090 Paradigmatic mTOR-opathy. *Cell Reports* 20: 868–880
- 1091 Lipton JO, Yuan ED, Boyle LM, Ebrahimi-Fakhari D, Kwiatkowski E, Nathan A, Güttler T, Davis  
1092 F, Asara JM & Sahin M (2015) The Circadian Protein BMAL1 Regulates Translation in  
1093 Response to S6K1-Mediated Phosphorylation. *Cell* 161: 1138–1151
- 1094 Liu T-Y, Huang HH, Wheeler D, Xu Y, Wells JA, Song YS & Wiita AP (2017) Time-Resolved  
1095 Proteomics Extends Ribosome Profiling-Based Measurements of Protein Synthesis  
1096 Dynamics. *Cell Systems* 4: 636-644.e9
- 1097 Ma D, Panda S & Lin JD (2011) Temporal orchestration of circadian autophagy rhythm by  
1098 C/EBP $\beta$ : C/EBP $\beta$  regulates circadian autophagy rhythm. *EMBO J* 30: 4642–4651
- 1099 Ma Y & Yates JR (2018) Proteomics and pulse azidohomoalanine labeling of newly  
1100 synthesized proteins: what are the potential applications? *Expert Rev Proteom* 15: 545–  
1101 554
- 1102 Malcolm M, Saad L, Penazzi LG & Garbarino-Pico E (2019) Processing Bodies Oscillate in  
1103 Neuro 2A Cells. *Frontiers in Cellular Neuroscience* 13
- 1104 Manasanch EE & Orlowski RZ (2017) Proteasome inhibitors in cancer therapy. *Nature*  
1105 *Reviews Clinical Oncology* 14: 417–433

- 1106 Marshall RS & Vierstra RD (2019) Dynamic Regulation of the 26S Proteasome: From  
1107 Synthesis to Degradation. *Front Mol Biosci* 6: 40
- 1108 Mathieson T, Franken H, Kosinski J, Kurzawa N, Zinn N, Sweetman G, Poeckel D, Ratnu VS,  
1109 Schramm M, Becher I, *et al* (2018) Systematic analysis of protein turnover in primary  
1110 cells. *Nat Commun* 9: 1–10
- 1111 Mauvoisin D & Gachon F (2020) Proteomics in Circadian Biology. *J Mol Biol* 432: 3565–3577
- 1112 Mauvoisin D, Wang J, Jouffe C, Martin E, Atger F, Waridel P, Quadroni M, Gachon F & Naef F  
1113 (2014) Circadian clock-dependent and -independent rhythmic proteomes implement  
1114 distinct diurnal functions in mouse liver. *Proceedings of the National Academy of*  
1115 *Sciences* 111: 167–172
- 1116 Mei W, Jiang Z, Chen Y, Chen L, Sancar A & Jiang Y (2021) Genome-wide circadian rhythm  
1117 detection methods: systematic evaluations and practical guidelines. *Brief Bioinform* 22:  
1118 bbaa135
- 1119 Musiek ES, Bhimasani M, Zangrilli MA, Morris JC, Holtzman DM & Ju Y-ES (2018) Circadian  
1120 Rest-Activity Pattern Changes in Aging and Preclinical Alzheimer Disease. *JAMA*  
1121 *Neurology* 75: 582
- 1122 O'Neill JS, Hoyle NP, Robertson JB, Edgar RS, Beale AD, Peak-Chew SY, Day J, Costa ASH,  
1123 Frezza C & Causton HC (2020) Eukaryotic cell biology is temporally coordinated to  
1124 support the energetic demands of protein homeostasis. *Nat Commun* 11: 4706
- 1125 Ong S-E, Blagoev B, Kratchmarova I, Kristensen DB, Steen H, Pandey A & Mann M (2002)  
1126 Stable Isotope Labeling by Amino Acids in Cell Culture, SILAC, as a Simple and Accurate  
1127 Approach to Expression Proteomics. *Molecular & Cellular Proteomics* 1: 376–386
- 1128 Ori A, Iskar M, Buczak K, Kastritis P, Parca L, Andrés-Pons A, Singer S, Bork P & Beck M  
1129 (2016) Spatiotemporal variation of mammalian protein complex stoichiometries.  
1130 *Genome Biology* 17
- 1131 Palazzo AF & Lee ES (2015) Non-coding RNA: what is functional and what is junk? *Front*  
1132 *Genet* 6: 2
- 1133 Pathak SS, Liu D, Li T, Zavalia N de, Zhu L, Li J, Karthikeyan R, Alain T, Liu AC, Storch K-F, *et al*  
1134 (2019) The eIF2 $\alpha$  Kinase GCN2 Modulates Period and Rhythmicity of the Circadian Clock  
1135 by Translational Control of Atf4. *Neuron* 104: 724-735.e6
- 1136 Price JC, Guan S, Burlingame A, Prusiner SB & Ghaemmaghami S (2010) Analysis of  
1137 proteome dynamics in the mouse brain. *Proceedings of the National Academy of Sciences*  
1138 107: 14508–14513
- 1139 Putker M, Crosby P, Feeney KA, Hoyle NP, Costa ASH, Gaude E, Frezza C & O'Neill JS (2018)  
1140 Mammalian Circadian Period, But Not Phase and Amplitude, Is Robust Against Redox and  
1141 Metabolic Perturbations. *Antioxid Redox Sign* 28: 507–520

- 1142 Ramanathan C, Kathale ND, Liu D, Lee C, Freeman DA, Hogenesch JB, Cao R & Liu AC (2018)  
1143 mTOR signaling regulates central and peripheral circadian clock function. *PLoS Genet* 14:  
1144 e1007369
- 1145 Raudvere U, Kolberg L, Kuzmin I, Arak T, Adler P, Peterson H & Vilo J (2019) g:Profiler: a web  
1146 server for functional enrichment analysis and conversions of gene lists (2019 update).  
1147 *Nucleic Acids Research* 47: W191–W198
- 1148 Ravi V, Jain A, Ahamed F, Fathma N, Desingu PA & Sundaresan NR (2018) Systematic  
1149 evaluation of the adaptability of the non-radioactive SUnSET assay to measure cardiac  
1150 protein synthesis. *Scientific Reports* 8
- 1151 Ravi V, Jain A, Mishra S & Sundaresan NR (2020) Measuring Protein Synthesis in Cultured  
1152 Cells and Mouse Tissues Using the Non-radioactive SUnSET Assay. *Current Protocols in*  
1153 *Molecular Biology* 133
- 1154 Reddy AB, Karp NA, Maywood ES, Sage EA, Deery M, O’Neill JS, Wong GKY, Chesham J, Odell  
1155 M, Lilley KS, *et al* (2006) Circadian Orchestration of the Hepatic Proteome. *Current*  
1156 *Biology* 16: 1107–1115
- 1157 Ribatti D (2017) A revisited concept: Contact inhibition of growth. From cell biology to  
1158 malignancy. *Experimental Cell Research* 359: 17–19
- 1159 Riggs CL, Kedersha N, Ivanov P & Anderson P (2020) Mammalian stress granules and P  
1160 bodies at a glance. *Journal of Cell Science* 133
- 1161 Robles MS, Cox J & Mann M (2014) In-Vivo Quantitative Proteomics Reveals a Key  
1162 Contribution of Post-Transcriptional Mechanisms to the Circadian Regulation of Liver  
1163 Metabolism. *PLoS Genetics* 10: e1004047
- 1164 Ross AB, Langer JD & Jovanovic M (2021) Proteome Turnover in the Spotlight: Approaches,  
1165 Applications, and Perspectives. *Molecular & Cellular Proteomics* 20: 100016
- 1166 Ryzhikov M, Ehlers A, Steinberg D, Xie W, Oberlander E, Brown S, Gilmore PE, Townsend RR,  
1167 Lane WS, Dolinay T, *et al* (2019) Diurnal Rhythms Spatially and Temporally Organize  
1168 Autophagy. *Cell Reports* 26: 1880-1892.e6
- 1169 Rzechorzek NM, Connick P, Patani R, Selvaraj BT & Chandran S (2015) Hypothermic  
1170 Preconditioning of Human Cortical Neurons Requires Proteostatic Priming. *EBioMedicine*  
1171 2: 528–535
- 1172 Santiago AM, Gonçalves DL & Morano KA (2020) Mechanisms of sensing and response to  
1173 proteotoxic stress. *Experimental Cell Research* 395: 112240
- 1174 Schindelin J, Arganda-Carreras I, Frise E, Kaynig V, Longair M, Pietzsch T, Preibisch S, Rueden  
1175 C, Saalfeld S, Schmid B, *et al* (2012) Fiji: an open-source platform for biological-image  
1176 analysis. *Nature Methods* 9: 676–682

- 1177 Schmidt EK, Clavarino G, Ceppi M & Pierre P (2009) SUnSET, a nonradioactive method to  
1178 monitor protein synthesis. *Nature Methods* 6: 275–277
- 1179 Schubert U, Antón LC, Gibbs J, Norbury CC, Yewdell JW & Bennink JR (2000) Rapid  
1180 degradation of a large fraction of newly synthesized proteins by proteasomes. *Nature*  
1181 404: 770–774
- 1182 Schwanhäusser B, Busse D, Li N, Dittmar G, Schuchhardt J, Wolf J, Chen W & Selbach M  
1183 (2011) Global quantification of mammalian gene expression control. *Nature* 473: 337–  
1184 342
- 1185 Seluanov A, Vaidya A & Gorbunova V (2010) Establishing Primary Adult Fibroblast Cultures  
1186 From Rodents. *J Vis Exp*
- 1187 Shen D, Coleman J, Chan E, Nicholson TP, Dai L, Sheppard PW & Patton WF (2011) Novel  
1188 Cell- and Tissue-Based Assays for Detecting Misfolded and Aggregated Protein  
1189 Accumulation Within Aggresomes and Inclusion Bodies. *Cell Biochemistry and Biophysics*  
1190 60: 173–185
- 1191 Sinturel F, Gerber A, Mauvoisin D, Wang J, Gatfield D, Stubblefield JJ, Green CB, Gachon F &  
1192 Schibler U (2017) Diurnal Oscillations in Liver Mass and Cell Size Accompany Ribosome  
1193 Assembly Cycles. *Cell* 169: 651-663.e14
- 1194 Smith PK, Krohn RI, Hermanson GT, Mallia AK, Gartner FH, Provenzano MD, Fujimoto EK,  
1195 Goeke NM, Olson BJ & Klenk DC (1985) Measurement of protein using bicinchoninic acid.  
1196 *Analytical Biochemistry* 150: 76–85
- 1197 Stangherlin A, Seinkmane E & O’Neill JS (2021a) Understanding circadian regulation of  
1198 mammalian cell function, protein homeostasis, and metabolism. *Curr Opin Syst Biology*  
1199 28: 100391
- 1200 Stangherlin A, Watson JL, Wong DCS, Barbiero S, Zeng A, Seinkmane E, Chew SP, Beale AD,  
1201 Hayter EA, Guna A, *et al* (2021b) Compensatory ion transport buffers daily protein  
1202 rhythms to regulate osmotic balance and cellular physiology. *Nat Commun* 12: 6035
- 1203 Szeto J, Kaniuk NA, Canadien V, Nisman R, Mizushima N, Yoshimori T, Bazett-Jones DP &  
1204 Brumell JH (2006) ALIS are Stress-Induced Protein Storage Compartments for Substrates  
1205 of the Proteasome and Autophagy. *Autophagy* 2: 189–199
- 1206 Szklarczyk D, Gable AL, Nastou KC, Lyon D, Kirsch R, Pyysalo S, Doncheva NT, Legeay M, Fang  
1207 T, Bork P, *et al* (2021) The STRING database in 2021: customizable protein–protein  
1208 networks, and functional characterization of user-uploaded gene/measurement sets.  
1209 *Nucleic Acids Research* 49: D605–D612
- 1210 Taggart JC, Zauber H, Selbach M, Li G-W & McShane E (2020) Keeping the Proportions of  
1211 Protein Complex Components in Check. *Cell Systems* 10: 125–132



- 1212 Thaben PF & Westermark PO (2014) Detecting Rhythms in Time Series with RAIN. *Journal of*  
1213 *Biological Rhythms* 29: 391–400
- 1214 Valvezan AJ & Manning BD (2019) Molecular logic of mTORC1 signalling as a metabolic  
1215 rheostat. *Nat Metab* 1: 321–333
- 1216 Vinayagam A, Hu Y, Kulkarni M, Roesel C, Sopko R, Mohr SE & Perrimon N (2013) Protein  
1217 Complex–Based Analysis Framework for High-Throughput Data Sets. *Science Signaling* 6
- 1218 Wagner PM, Prucca CG, Velazquez FN, Alderete LGS, Caputto BL & Guido ME (2021)  
1219 Temporal regulation of tumor growth in nocturnal mammals: In vivo studies and  
1220 chemotherapeutical potential. *The FASEB Journal* 35
- 1221 Wang F, Durfee LA & Huibregtse JM (2013) A Cotranslational Ubiquitination Pathway for  
1222 Quality Control of Misfolded Proteins. *Mol Cell* 50: 368–378
- 1223 Wang R, Jiang X, Bao P, Qin M & Xu J (2019) Circadian control of stress granules by  
1224 oscillating EIF2 $\alpha$ . *Cell Death Dis* 10
- 1225 Welsh DK, Yoo S-H, Liu AC, Takahashi JS & Kay SA (2004) Bioluminescence Imaging of  
1226 Individual Fibroblasts Reveals Persistent, Independently Phased Circadian Rhythms of  
1227 Clock Gene Expression. *Curr Biol* 14: 2289–2295
- 1228 Wheatley D, Giddings M & Inglis M (1980) Kinetics of degradation of short- and long-lived  
1229 proteins in cultured mammalian cells. *Cell Biology International Reports* 4: 1081–1090
- 1230 Wolff S, Weissman JS & Dillin A (2014) Differential Scales of Protein Quality Control. *Cell*  
1231 157: 52–64
- 1232 Wong DCS, Seinkmane E, Zeng A, Stangherlin A, Rzechorzek NM, Beale AD, Day J, Reed M,  
1233 Peak-Chew SY, Styles CT, *et al* (2022) CRYPTOCHROMES promote daily protein  
1234 homeostasis. *Embo J* 41: e2021108883
- 1235 Wu R, Dang F, Li P, Wang P, Xu Q, Liu Z, Li Y, Wu Y, Chen Y & Liu Y (2019) The Circadian  
1236 Protein Period2 Suppresses mTORC1 Activity via Recruiting Tsc1 to mTORC1 Complex.  
1237 *Cell Metab* 29: 653-667.e6
- 1238 Xu M, McCanna DJ & Sivak JG (2015) Use of the viability reagent PrestoBlue in comparison  
1239 with alamarBlue and MTT to assess the viability of human corneal epithelial cells. *Journal*  
1240 *of Pharmacological and Toxicological Methods* 71: 1–7
- 1241 Yoo S-H, Yamazaki S, Lowrey PL, Shimomura K, Ko CH, Buhr ED, Slepka SM, Hong H-K, Oh  
1242 WJ, Yoo OJ, *et al* (2004) PERIOD2::LUCIFERASE real-time reporting of circadian dynamics  
1243 reveals persistent circadian oscillations in mouse peripheral tissues. *P Natl Acad Sci Usa*  
1244 101: 5339–5346

1245 Zhang R, Lahens NF, Ballance HI, Hughes ME & Hogenesch JB (2014) A circadian gene  
1246 expression atlas in mammals: Implications for biology and medicine. *Proc National Acad*  
1247 *Sci* 111: 16219–16224

1248 Zhang X, Linder S & Bazzaro M (2020) Drug Development Targeting the Ubiquitin–  
1249 Proteasome System (UPS) for the Treatment of Human Cancers. *Cancers* 12: 902

1250 Zhuang Y, Li Z, Xiong S, Sun C, Li B, Wu SA, Lyu J, Shi X, Yang L, Chen Y, *et al* (2023) Circadian  
1251 clocks are modulated by compartmentalized oscillating translation. *Cell* 186: 3245–  
1252 3260.e23

1253

## 1254 **Figure legends**

1255

### 1256 **Figure 1.**

1257

1258 **A** A representative phosphor screen exposure of SDS-PAGE gel showing <sup>35</sup>S-Met/Cys  
1259 incorporation in 15 min pulse (P) and 1 h chase (C) samples at different circadian times  
1260 in mouse lung fibroblasts lysed with digitonin buffer.

1261 **B** Quantification of radiolabel signal in pulse and chase at the different timepoints,  
1262 normalised to protein content (by Coomassie stain) in four replicates shown in Fig S1A.  
1263 Statistics: two-way ANOVA with Dunnett’s multiple comparison test, comparing T24 to  
1264 other timepoints. On the right, the inferred degradation within 1h of chase is plotted,  
1265 calculated as 100%\*(1-Chase/Pulse). Statistics: one-way ANOVA with Dunnett’s multiple  
1266 comparison test, comparing T24 to other timepoints.

1267 **C** Chymotrypsin-like, trypsin-like, and caspase-like proteasome activities, measured by  
1268 ProteasomeGlo cell-based assays, at different circadian times as indicated. Statistics:  
1269 damped cosine wave fit compared with straight line (null hypothesis) by extra sum-of-  
1270 squares F test, the statistically preferred fit is plotted and p-value displayed. Parallel  
1271 PER2::LUC bioluminescence recording from replicate cell cultures (mean +/- SEM, every  
1272 30 min) is shown below, acting as phase marker.

1273 **D** Schematic representation of the optimised puromycin incorporation assay. Puromycin  
1274 (Puro) is incorporated into nascent peptide chains during translation elongation. A  
1275 subset of these gets degraded by the proteasome within the 30 min labelling timeframe,  
1276 resulting in a measure of “net” translation. In the presence of bortezomib (BTZ), the  
1277 proteasome is inhibited, so the peptides that would have been degraded are still  
1278 present and can be detected. Thus, all nascently translated peptide chains can be  
1279 detected. Degradation can be inferred from comparing the two conditions, and allows  
1280 estimation of both translation and degradation in a single assay.

1281 **E** Quantification of total protein, protein synthesis and protein turnover from a  
1282 puromycin incorporation timecourse, where at each of the 12 timepoints Puro ± BTZ  
1283 was added directly to cell media, and cells lysed 30 min afterwards in digitonin buffer.  
1284 Puromycin incorporation was assessed by Western blotting, and total protein from a  
1285 parallel Ponceau Red stain. Change in degradation was calculated from fitted data of  
1286 puromycin incorporation, relative to mean degradation level. Statistics: damped cosine  
1287 wave fit compared with straight line (null hypothesis) by extra sum-of-squares F test, the

1288 statistically preferred fit is plotted and p-value displayed. Parallel PER2::LUC  
1289 bioluminescence recording from replicate cell cultures (mean +/- SEM, every 30 min) is  
1290 shown below, acting as phase marker (example phase comparison is shown as dashed  
1291 line).

1292 **F** Puromycin incorporation *in vivo*: mice received an i.p. injection of puromycin with or  
1293 without BTZ at ZT1 or ZT13 (note: zeitgeber = 'time-giver' and indicates hours since  
1294 initial lights on). Livers were harvested 40 min afterwards and extracted with  
1295 urea/thiourea buffer. Representative anti-puromycin Western blot is shown, and  
1296 quantification is shown on the right, normalised for protein loading as assessed by  
1297 Coomassie staining. Statistics: two-way ANOVA with Sidak's multiple comparisons test.  
1298 Four mice were used per condition, but in some cases one of the four injections were  
1299 not successful i.e. no puromycin labelling was observed and so no quantification could  
1300 be performed (full data in Fig S2B).

1301  
1302

## 1303 **Figure 2.**

1304

1305 **A** Schematic of circadian pulsed SILAC-TMT experiment design. In a set of entrained  
1306 fibroblasts, at each circadian timepoint "light" media (DMEM with standard L-Arg and L-  
1307 Lys) is switched for "heavy" (DMEM with  $^{13}\text{C}_6^{15}\text{N}_4$  L-Arg and  $^{13}\text{C}_6^{15}\text{N}_2$  L-Lys), and cells  
1308 lysed after 6h. Lysates are then digested, labelled with tandem mass tags (TMT), mixed  
1309 and analysed by mass spectrometry. Data are presented aligned with the midpoint of  
1310 the labelling window.

1311 **B** Parallel bioluminescence recording of PER2::LUC, acting as phase marker, overlaid  
1312 with SILAC labelling windows that were used for the timecourse.

1313 **C** Representative examples of proteins (taken from Supplemental Table 1) changing  
1314 rhythmically or staying constant in their total abundance (left) or synthesis (right), as  
1315 measured in the pSILAC-TMT timecourse and rhythmicity defined by RAIN  $p < 0.05$ . R-  
1316 epresentative of rhythmic abundance and synthesis: Akap12; representative of  
1317 arrhythmic abundance and synthesis: Dnmt1; representative of rhythmic abundance but  
1318 arrhythmic synthesis: Rnf170; and representative of arrhythmic abundance but rhythmic  
1319 synthesis: Nup107.

1320 **D** Probability density distribution of fold-change between peak and trough for proteins  
1321 rhythmic in synthesis and in total abundance, representing the extent of change over  
1322 time in these two sets. Statistics: Mann-Whitney test,  $p < 0.0001$ .

1323 **E** Comparison of rhythmicity between individual proteins' synthesis and total  
1324 abundance. Statistically, significant change over time was assessed by two algorithms,  
1325 RAIN and ANOVA, with  $p < 0.05$  taken as rhythmicity threshold. (Top) Percentages of  
1326 detected proteins falling under the four rhythmicity categories by the two algorithms  
1327 are displayed; (Bottom) Venn diagrams of proteins significant for rhythms in synthesis  
1328 and/or abundance. Degradation rhythms can account for cases of proteins with rhythms  
1329 in synthesis but not abundance, or *vice versa*. Overall, 6264 proteins were detected; out  
1330 of those at least one heavy peptide was detected for 2528 proteins (the set used for the  
1331 analysis).

1332 **F** Phase distribution of proteins rhythmic (with threshold RAIN  $p < 0.05$ ) in both synthesis  
1333 and total abundance, as well as their circadian phase difference. Gene ontology  
1334 functional enrichment was tested for by GOrilla tool, in each phase separately or

1335 together, against the background of all detected proteins, and no terms were significant  
1336 below the corrected p-value (FDR q-value) 0.05 cutoff. Phase 0 is set as the peak of  
1337 PER2::LUC.

1338 **G** Phase distribution of proteins rhythmic (with threshold RAIN  $p < 0.05$ ) in their total  
1339 abundance and in their synthesis. Phase 0 is set as the peak of PER2::LUC.

1340

1341

1342 **Figure 3.**

1343

1344 **A** Schematic of circadian pulsed SILAC-TMT with extra fractionation step. In a set of  
1345 entrained fibroblasts, at each circadian timepoint “light” media (DMEM with standard L-  
1346 Arg and L-Lys) is switched for “heavy” (DMEM with  $^{13}\text{C}_6^{15}\text{N}_4$  L-Arg and  $^{13}\text{C}_6^{15}\text{N}_2$  L-Lys), and  
1347 cells collected after 1.5h. Samples were then subjected to sequential ultracentrifugation,  
1348 a method adjusted from Geladaki *et al.* 2019 LOPIT-DC protocol. The fraction enriched  
1349 for macromolecular protein complexes (MMC fraction) was labelled with tandem mass  
1350 tags (TMT), mixed and analysed by mass spectrometry.

1351 **B** Parallel bioluminescence recording of PER2::LUC, acting as phase marker, overlaid  
1352 with SILAC labelling windows that were used for the timecourse.

1353 **C** Comparison of percentage of detected proteins that are considered rhythmic ( $p < 0.05$ )  
1354 in their synthesis by the two algorithms used, between the whole-cell pSILAC  
1355 experiment, presented in Fig 2, and the experiment focused on complexes, presented in  
1356 this figure.

1357 **D** Probability density distribution of fold-change between peak and trough for proteins  
1358 rhythmic in synthesis and in total abundance, representing the extent of change over  
1359 time in these two sets. Statistics: Mann-Whitney test.

1360 **E** Comparison of rhythmicity between individual proteins’ synthesis and total  
1361 abundance. Statistically, significant change over time was assessed by two algorithms,  
1362 RAIN and ANOVA, with  $p < 0.05$  taken as rhythmicity threshold. Percentages of detected  
1363 proteins falling under the four rhythmicity categories by the two algorithms are  
1364 displayed. Overall, 6577 proteins were detected; out of those at least one heavy peptide  
1365 was detected for 2302 proteins (the set used for the analysis).

1366 **F** Coordinated turnover of proteins belonging to complexes: for four selected complexes,  
1367 their annotated subunits (according to a compilation of CORUM, COMPLEAT and manual  
1368 annotations) were averaged in terms of their fold-change over time (x-axis), and relative  
1369 turnover (proportion of heavy to total peptide intensity averaged across 8 timepoints, y  
1370 axis). All proteins are displayed in the background in grey. Normalised heavy abundance,  
1371 i.e. synthesis, of these proteins over time is shown on heatmaps on the right.

1372 **G** Proteins rhythmic (RAIN  $p < 0.05$ ) in their synthesis were analysed using STRING  
1373 interaction database, filtering for high-confidence, physical interactions. Proteins with  
1374 rhythmic synthesis in the complex fraction had an interconnected protein-protein  
1375 interaction network, with high average node degree and significant enrichment in  
1376 interactions over all detected proteins in that experiment, whereas for proteins with  
1377 rhythmic synthesis in the whole-cell experiment (Fig 2) this was not the case.

1378 **H** Fibroblasts were pulsed with AHA for 1.5h at the indicated timepoints, and AHA  
1379 incorporation into protein complexes and other higher molecular weight species under  
1380 native conditions, using biotin as click substrate and streptavidin-HRP for detection after  
1381 non-denaturing gel electrophoresis. Signal was quantified and normalised to total

1382 protein content as measured by SyproRuby (middle), and Ponceau stain of the native  
1383 PAGE membrane (bottom) shows molecular weight of the loaded species. Statistics:  
1384 damped cosine wave fit (plotted) preferred over straight line, extra sum-of-squares F  
1385 test p-value displayed.

1386  
1387

1388 **Figure 4.**

1389

1390 **A** Phase distribution of proteins rhythmic (RAIN  $p < 0.05$ ) in their total abundance and in  
1391 their synthesis in the MMC fraction. Gene ontology functional enrichment for biological  
1392 processes was performed using GOrilla tool, with proteins at each phase compared  
1393 against all detected proteins in this experiment, and FDR q-value (multiple comparisons  
1394 adjusted p-value) threshold of 0.05. For phase “0/24”, top significant non-overlapping  
1395 terms are presented, alongside their significance and fold-enrichment values. In phase  
1396 “18”, terms associated with actin were enriched ( $q < 0.05$ ), e.g. “actin filament bundle  
1397 assembly” (8.85-fold enrichment).

1398 **B** Example proteins peaking at phase “0/24”, belonging to terms associated with  
1399 ribonucleoprotein complex assembly and stress granule assembly. Plotted are their  
1400 abundance and synthesis in the MMC fraction as well as at whole-cell level (measured  
1401 independently).

1402 **C** Example proteins peaking at phase “18”, associated with actin assembly. Plotted are  
1403 their abundance and synthesis in the MMC fraction as well as at whole-cell level.

1404

1405

1406 **Figure 5**

1407

1408 **A** Schematic of Edmondson assay for nascent rRNA labelling. In a set of entrained  
1409 fibroblasts, at each circadian timepoint, 200  $\mu\text{M}$  of heavy ( $^{15}\text{N}_2$ )-uridine is spiked into  
1410 media for 6hr to metabolically label all nascent RNA prior to collecting cells. Total RNA  
1411 or rRNA derived from assembled ribosomal complexes is extracted from cell pellets  
1412 before treatment with micrococcal nuclease to completely digest RNA to free  
1413 nucleotides monophosphates. The abundance of heavy and light uridine  
1414 monophosphate (UMP) is then quantified by mass spectrometry.

1415 **B** Circadian regulation of ribosome turnover detected by Edmondson assay. (Top) Total  
1416 UMP abundance for total cellular RNA and rRNA in assembled ribosomes. (Middle)  
1417 Heavy UMP reports RNA synthesised in the preceding 6 hours, expressed as a  
1418 percentage of total cellular UMP and UMP that was incorporated within assembled  
1419 ribosomes, respectively. Note that heavy UMP was first corrected for natural  
1420 abundance detected in unlabelled fibroblasts. (Bottom) Parallel PER2::LUC  
1421 bioluminescence recording, conducted under the same experimental and timecourse  
1422 conditions. Statistics: damped cosine wave fit compared with straight line (null  
1423 hypothesis) by extra sum-of-squares F test, the statistically preferred fit is plotted and  
1424 p-value displayed.

1425

1426 **Figure 6.**

1427

1428 **A** (Left) Two sets of fibroblast lysates were collected every 4 h for 3 days, one untreated  
1429 control and one treated with 20  $\mu$ M MG132 proteasomal inhibitor for 4 h before each  
1430 collection. Fold-change increase in relative phosphorylation of eIF2 $\alpha$  (i.e.  $(p\text{-eIF2}\alpha/\text{total})_{\text{MG132}}/(p\text{-eIF2}\alpha/\text{total})_{\text{control}}$ ) at each timepoint is plotted. MG132 is expected  
1431 to induce increase in phosphorylation of eIF2 $\alpha$  but the extent of the induction differs.  
1432 Statistics: damped cosine wave fit (plotted) preferred over straight line, extra sum-of-  
1433 squares F test p-value displayed. (Right) Parallel PER2::LUC bioluminescence recording,  
1434 conducted under the same experimental and timecourse conditions as experiments in  
1435 (A), (B) and (C).  
1436  
1437 **B** Cells were treated with 20  $\mu$ M MG132 for 24h starting at indicated timepoints, and  
1438 aggregation relative to untreated samples measured by Proteostat aggresome kit.  
1439 MG132 is expected to induce aggregation but the extent of the induction differs.  
1440 Statistics: One-way ANOVA  $p < 0.0001$ , stars and colours represent Dunnett's multiple  
1441 comparison of neighbouring timepoints. The difference between T24 & T48 as well as  
1442 between T36 & T60 was not statistically significant.  
1443  
1444 **C** At 8 timepoints throughout 2 days, fibroblasts were treated with 2.5  $\mu$ M proteasomal  
1445 inhibitor bortezomib (BTZ), 25  $\mu$ M translation inhibitor cycloheximide (CHX), or vehicle  
1446 control; after 6 h, the drugs were washed out, allowing cells to recover for further 18 h.  
1447 Cellular viability after the treatments, as measured by PrestoBlue High Sensitivity assay,  
1448 is expressed as a proportion of control (vehicle-treated) cells at each timepoint.  
1449 Statistics: damped cosine wave fit compared with straight line (null hypothesis) by extra  
1450 sum-of-squares F test, the statistically preferred fit is plotted & p-value displayed.  
1451  
1452 **D** Time-of-day bortezomib (BTZ) effect *in vivo*: mice received an i.p. injection of BTZ or  
1453 vehicle control (VEH) at ZT1 or ZT13, and livers were harvested 5h after the treatment.  
1454 Representative Western blot is shown, blots, probed for total (green) and S51-  
1455 phosphorylated (red) eIF2 $\alpha$ .  
1456  
1457 **E** Quantification of relative phosphorylation levels of eIF2 $\alpha$  from experiment in (D).  
1458 Statistics: repeated measures two-way ANOVA with Sidak's multiple comparisons test  
1459  
1460 **F** Fold-change increase in phosphorylation of eIF2 $\alpha$  upon bortezomib injection,  
1461 quantified from (E). Statistics: paired t-test.

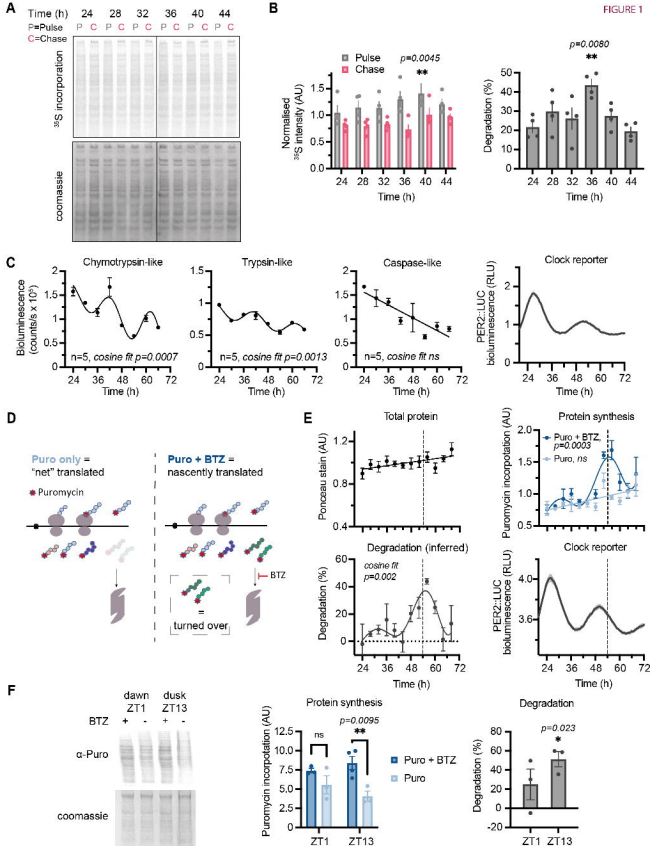

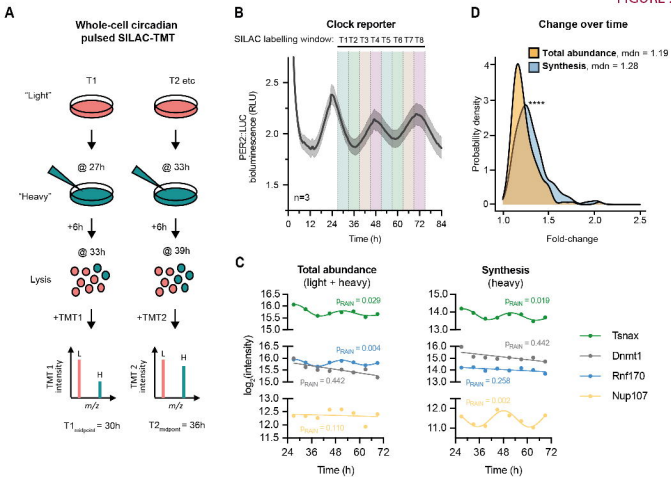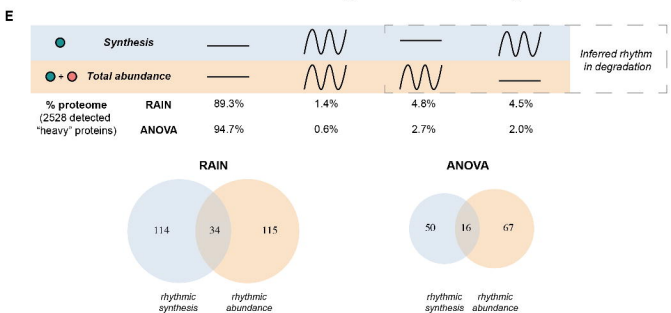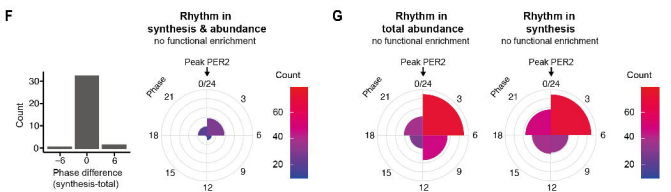



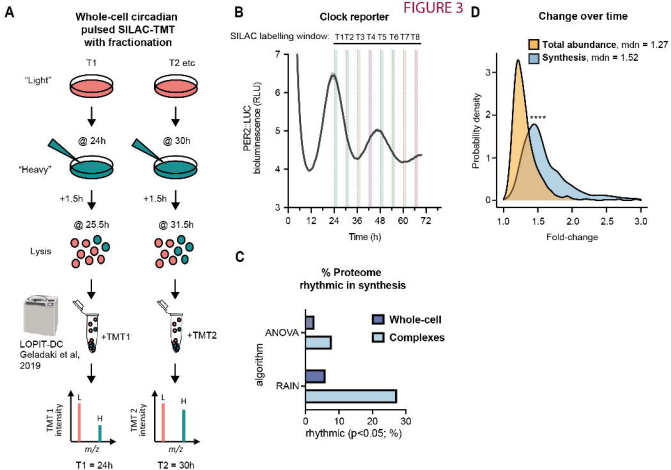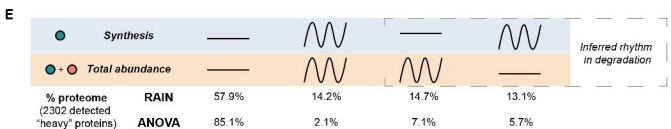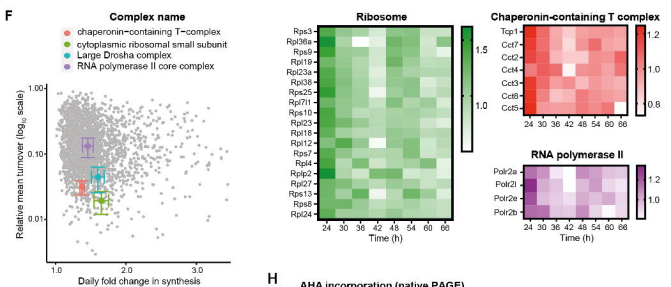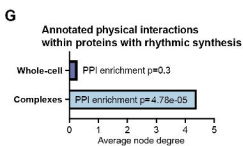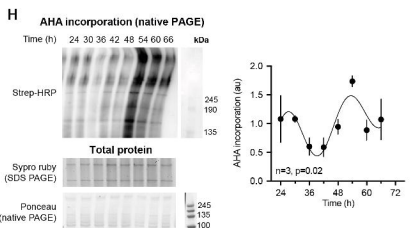

A

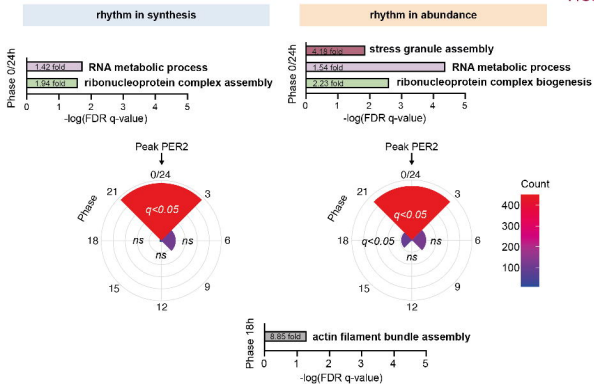

B

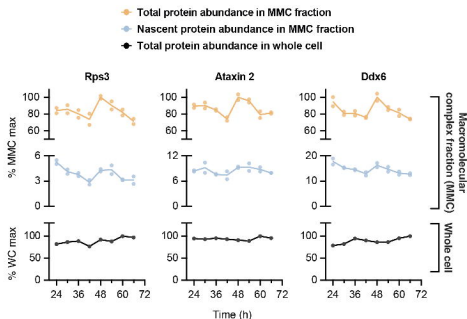

C

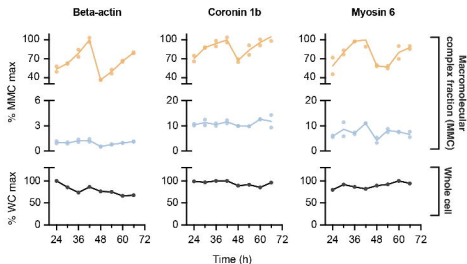

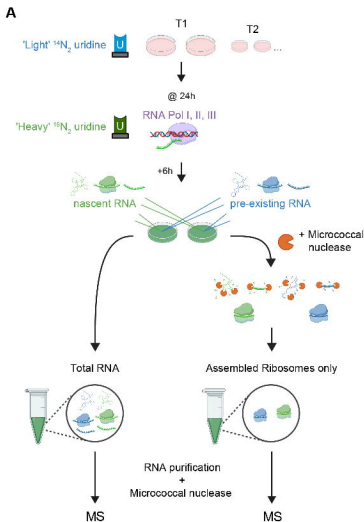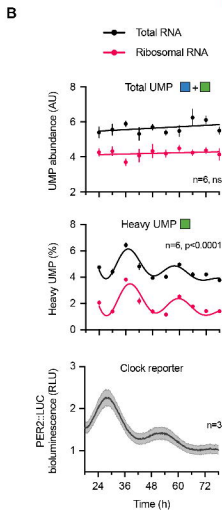

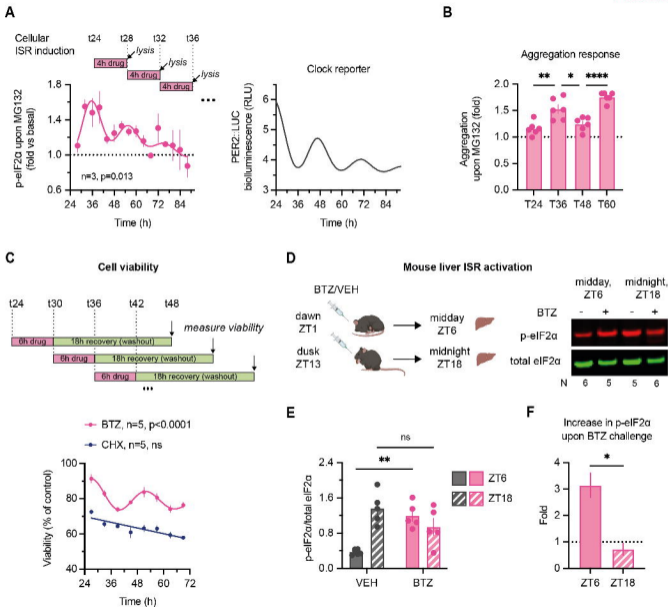

Source: http://biorxiv.org/content/10.1101/2022.09.30.509905v2.full.pdf
